# Supplementary material for: Investigating the psychedelic hypothesis of kykeon, the sacred elixir of the Eleusinian Mysteries
Source: Springer Nature journal article supplement (doi:10.1038/s41598-026-39568-3), 2026-02-13
Supplement: MOESM1 [file 41598_2026_39568_MOESM1_ESM.pdf]

## **Supplementary Data**

### **Investigating the psychedelic hypothesis of *kykeon*, the sacred elixir of the Eleusinian Mysteries**

Romanos K. Antonopoulos<sup>1,2,+</sup>, Evangelos Dadiotis<sup>1,2,+,\*</sup>, Kostas Ioannidis<sup>3</sup>, Antigoni Cheilari<sup>1</sup>, Vangelis Mitsis<sup>2</sup>, Ana M. Garcia-Campaña<sup>4</sup>, Laura Gámiz-Gracia<sup>4</sup>, Maykel Hernández-Mesa<sup>4</sup>, Alfonso Narváez<sup>4</sup>, Mark A. Hoffman<sup>5</sup>, Carl A. P. Ruck<sup>6</sup>, Zacharoula Gonou-Zagou<sup>7</sup>, Nektarios Aligiannis<sup>1</sup>, Prokopios Magiatis<sup>1,\*</sup>

<sup>1</sup> *Laboratory of Pharmacognosy and Chemistry of Natural Products, Department of Pharmacy, National and Kapodistrian University of Athens (NKUA), Panepistimioupoli Zografou, 15771 Athens, Greece*

<sup>2</sup> *Hellenic Center for Entheogenic Research, NPC, Porto Rafti, 19003 Attica, Greece*

<sup>3</sup> *Laboratory of Sylviculture, Forest Genetics and Biotechnology, Institute of Mediterranean and Forest Ecosystems, Hellenic Agricultural Organization “Demeter”, Ilissia, 11528 Athens, Greece*

<sup>4</sup> *Department of Analytical Chemistry, Faculty of Sciences, University of Granada, 18071 Granada, Spain*

<sup>5</sup> *The Wasson Ruck Entheogenic Research Institute and Archives, Taos, NM 87571, USA*

<sup>6</sup> *Department of Classical Studies, Boston University, Boston, MA 02215, USA*

<sup>7</sup> *Section of Ecology and Systematics, Department of Biology, National and Kapodistrian University of Athens (NKUA), Panepistimioupoli Zografou, 15784 Athens, Greece*

---

\* Corresponding authors. Laboratory of Pharmacognosy and Chemistry of Natural Products, Department of Pharmacy, National and Kapodistrian University of Athens (NKUA), Panepistimioupoli Zografou, 15771 Athens, Greece. E-mail address: e.dadiotis@northeastern.edu (E. Dadiotis); magiatis@pharm.uoa.gr (P.M). Tel.: (+30) 210 727 4052

+ These authors contributed equally to this work

## Table of Contents

|                                                                                                                                                        |    |
|--------------------------------------------------------------------------------------------------------------------------------------------------------|----|
| <b>Supplementary Note 1:</b> Ergot alkaloids – Structure, stereochemistry, classification and biosynthesis. ....                                       | 4  |
| <b>Supplementary Note 2:</b> Kykeon in ancient Greek texts – Variants, cultural context, standardization, technical and preparation aspects .....      | 5  |
| <b>Figure S1.</b> <sup>1</sup> H NMR (400 MHz) spectrum of LSA (compound <b>1</b> ) in CDCl <sub>3</sub> .....                                         | 6  |
| <b>Figure S2.</b> Expanded region of the high-field resonances of rings C and D (δ 2.6–3.6 ppm) of LSA (compound <b>1</b> ) from Figure S1 .....       | 6  |
| <b>Figure S3.</b> Expanded region of the low-field resonances (δ 6.5–7.3 ppm) of LSA (compound <b>1</b> ) from Figure S1 .....                         | 7  |
| <b>Figure S4.</b> <sup>1</sup> H NMR (400 MHz) spectrum of LSA (compound <b>1</b> ) in DMSO-d <sub>6</sub> .....                                       | 7  |
| <b>Figure S5.</b> Expanded region of the high-field resonances of rings C and D (δ 2.4–3.5 ppm) of LSA (compound <b>1</b> ) from Figure S4 .....       | 8  |
| <b>Figure S6.</b> Expanded region of the low-field resonances (δ 6.3–7.2 ppm) of LSA (compound <b>1</b> ) from Figure S4 .....                         | 8  |
| <b>Figure S7.</b> <sup>13</sup> C NMR (100 MHz) spectrum of LSA (compound <b>1</b> ) in DMSO-d <sub>6</sub> .....                                      | 9  |
| <b>Figure S8.</b> <sup>1</sup> H– <sup>1</sup> H COSY spectrum of LSA (compound <b>1</b> ) in CDCl <sub>3</sub> .....                                  | 9  |
| <b>Figure S9.</b> <sup>1</sup> H– <sup>1</sup> H COSY spectrum of LSA (compound <b>1</b> ) in DMSO-d <sub>6</sub> .....                                | 10 |
| <b>Figure S10.</b> <sup>1</sup> H– <sup>13</sup> C HSQC spectrum of LSA (compound <b>1</b> ) in DMSO-d <sub>6</sub> .....                              | 10 |
| <b>Figure S11.</b> <sup>1</sup> H– <sup>13</sup> C HMBC spectrum of LSA (compound <b>1</b> ) in DMSO-d <sub>6</sub> .....                              | 11 |
| <b>Figure S12.</b> <sup>1</sup> H NMR (400 MHz) spectra of iso-LSA (compound <b>2</b> ) in CDCl <sub>3</sub> .....                                     | 11 |
| <b>Figure S13.</b> Expanded region of the high-field resonances of rings C and D (δ 2.5–3.6 ppm) of iso-LSA (compound <b>2</b> ) from Figure S12 ..... | 12 |
| <b>Figure S14.</b> Expanded region of the low-field resonances (δ 6.5–7.3 ppm) of iso-LSA (compound <b>2</b> ) from Figure S12 .....                   | 12 |
| <b>Figure S15.</b> <sup>1</sup> H NMR (400 MHz) spectra of iso-LSA (compound <b>2</b> ) in DMSO-d <sub>6</sub> ...                                     | 13 |
| <b>Figure S16.</b> Expanded region of the high-field resonances of rings C and D (δ 2.4–3.5 ppm) of iso-LSA (compound <b>2</b> ) from Figure S15 ..... | 13 |

## Table of Contents (cont.)

|                                                                                                                                                                                                                                 |    |
|---------------------------------------------------------------------------------------------------------------------------------------------------------------------------------------------------------------------------------|----|
| <b>Figure S17.</b> Expanded region of the low-field resonances ( $\delta$ 6.4–7.3 ppm) of iso-LSA (compound <b>2</b> ) from Figure S15 .....                                                                                    | 14 |
| <b>Figure S18.</b> $^{13}\text{C}$ NMR (100 MHz) spectrum of iso-LSA (compound <b>2</b> ) in DMSO- $d_6$ .....                                                                                                                  | 14 |
| <b>Figure S19.</b> $^1\text{H}$ – $^1\text{H}$ COSY spectrum of iso-LSA (compound <b>2</b> ) in $\text{CDCl}_3$ .....                                                                                                           | 15 |
| <b>Figure S20.</b> $^1\text{H}$ – $^1\text{H}$ COSY spectrum of iso-LSA (compound <b>2</b> ) in DMSO- $d_6$ .....                                                                                                               | 15 |
| <b>Figure S21.</b> $^1\text{H}$ – $^{13}\text{C}$ HSQC spectrum of iso-LSA (compound <b>2</b> ) in DMSO- $d_6$ .....                                                                                                            | 16 |
| <b>Figure S22.</b> $^1\text{H}$ – $^{13}\text{C}$ HMBC spectrum of iso-LSA (compound <b>2</b> ) in DMSO- $d_6$ .....                                                                                                            | 16 |
| <b>Figure S23.</b> a) Conidia at 400 $\times$ (DIC; scale bar = 10 $\mu\text{m}$ ), b) sclerotia (scale in cm), and c) inoculated sclerotia on PDA in a 9 cm Petri plate after 1 week. All images from strain ATHUM 10382. .... | 17 |
| <b>Table S1.</b> Sequence of the ITS rDNA region of ATHUM 10382 .....                                                                                                                                                           | 15 |
| <b>Figure S24.</b> Total ion chromatogram (TIC) and extracted ion chromatograms (EICs) of reference standards.....                                                                                                              | 18 |
| <b>Table S2.</b> UHPLC/Q-TOF-HRMS quantitation results for LSA and iso-LSA in the extracts and related calculations.....                                                                                                        | 19 |
| <b>Figure S25.</b> Proposed mechanism of the chemical transformation of the ergopeptines ergokryptine and ergocristine into LSA/iso-LSA and non-toxic secondary by-products.....                                                | 20 |
| <b>Table S3.</b> Results of effect tests and parameter estimates, together with their levels of significance, derived from the model equations employed for LSA .....                                                           | 21 |
| <b>Table S4.</b> Results of effect tests and parameter estimates, together with their levels of significance, derived from the model equations employed for iso-LSA .....                                                       | 21 |
| <b>Table S5.</b> Summary of fit based on the model equations applied for LSA and iso-LSA. ....                                                                                                                                  | 21 |
| <b>References</b> .....                                                                                                                                                                                                         | 22 |

## Supplementary Note 1: Ergot alkaloids – Structure, stereochemistry, classification and biosynthesis.

### General Description

Over 80 ergot alkaloids (EAs) have been isolated from diverse natural sources, primarily from members of the genus *Claviceps* infecting higher plants, but also from other fungal taxa occurring as symbionts or endophytes of their hosts<sup>1-4</sup>. EAs are a structurally diverse class of alkaloids biosynthetically derived from tryptophan (Trp) and dimethylallyl pyrophosphate (DMAPP)<sup>5</sup>, along with their semi-synthetic derivatives and synthetic analogues. All share the ergoline ring system as their core structure<sup>6</sup>.

### Stereochemistry

- Most EAs are methylated at N-6 and substituted at C-8<sup>7,8</sup>
- They commonly feature a double bond at either C8–C9 ( $\Delta^{8,9}$ -ergolenes) or C9–C10 ( $\Delta^{9,10}$ -ergolenes)<sup>6</sup>.
- Stereocenters occur at C-5 and C-8 (or C-10), allowing up to four stereoisomers per E<sup>6</sup>.
- In naturally occurring EAs, the C-5 stereocenter is invariably (*R*) configuration<sup>8</sup>.
- At C-8, (*R*)-epimers (i.e., (+)-*d*-lysergic acid derivatives) are designated with the suffix “-ine” and they typically exhibit high pharmacological activity at adrenergic, dopaminergic, and serotonergic receptors<sup>9-11</sup>.
- The usually inactive (*S*)-epimers carry the suffix “-inine” or the prefix “iso-”<sup>10</sup>.
- C-8 epimers are interconvertible and prone to epimerization under heat, light, or extreme pH<sup>7</sup>.
- Historical terms like  $\alpha$  and  $\beta$  epimers refer to the same C-8 stereochemistry but are inconsistent with modern nomenclature<sup>11</sup>.

### Structural Classes of EAs<sup>4,7,8</sup>

EAs are categorized into four main biosynthetically related groups:

#### 1. Clavines

- Ergoline structure or tricyclic precursors of ergoline with an open D ring.
- Do not yield lysergic acid upon hydrolysis.
- Subdivided into tetracyclic, tricyclic, or rearranged subclasses.

#### 2. Lysergamides (Ergoamides)

- Simple lysergic acid derivatives (primary or secondary amides).
- Include compounds such as LSA and LSD analogues.

#### 3. Ergopeptines

- Lysergic acid linked to three amino acids forming a tricyclic peptide.
- Classified into subgroups based on peptide composition.
- Often referred to as cyclol ergot alkaloids (CEA).

#### 4. Ergopeptams

- Structurally similar to ergopeptines but with a bicyclic peptide.
- Classified into subgroups based on peptide composition.
- Often annotated as lactam ergot alkaloids (LEA).

(Ergopeptines and ergopeptams are collectively called peptidic EAs or ergopeptides)

## Supplementary Note 2: Kykeon in ancient Greek texts – Variants, cultural context, standardization, technical and preparation aspects.

There are many “versions” or variants of the kykeon, described in ancient Greek manuscripts beyond the Eleusinian formulation. Despite their variations, all share a common nucleus: mainly prepared by women with the inclusion of barley, barley groats or barley flour referred to in ancient Greek as *ἄλφι*, *ἄλφιτον*, or *ἄλφιστα*<sup>12</sup>, with the resulting mixture acting as a drug, referred to in ancient Greek as *φάρμακον* (from *φέρω* “to bring” and *ἄκος* “cure/remedy”), highlighting kykeon’s dual role as both a therapeutic agent and a potentially intoxicating and ritualistic substance<sup>13</sup>. Such examples in ancient Greek literature, beyond the Eleusinian formulation, are the following:

1. A tonic mixed restorative potion prepared by Hecamede and given to Nestor and the wounded Machaon, when they left the fray of battle of Troy, referred to in book 11 line 624 (or 638–641 depending on edition) in Homer’s “The Illiad”. The drink includes barley-meal, goat-cheese grated into a wine (Pramnian wine) base.
2. The magic intoxicating mixed potion crafted by the demi-goddess and witch Kirke (Circe) and used to drug Odysseus and transform his companions into swine as referred to in book 10 lines 234–237, 290 and 316–317 of Homer’s “The Odyssey”. Kirke also adds some honey and pours her magic potion into it.
3. The kykeon referred by the ancient Greek poet Hipponax as a drug or remedy for his soul torments<sup>13</sup>.
4. Theophrastus (319 BC) refers to the drink in his “Characters” (IV, 2-3), mentioning a drunk farmer whose thyme-scented breath annoyed the Assembly in the Ecclesia.
5. Its digestive properties are mentioned in Aristophanes’ “Peace” (V. 712) (421 BC), when Hermes suggests it to the hero who had eaten too many dried fruits and nuts.

Scale and standardization: The preparation of kykeon for thousands of initiates would have been facilitated by large-capacity vessels, called *λέβητες* (*lebetes*; cauldrons). Large-scale preparation naturally acts as an empirical “chemical buffer” averaging out potential variations and ensuring a more consistent final product across the entire batch. In an era before analytical chemistry, such consistency was likely maintained through hereditary ritual protocols and the use of fixed ingredient ratios (e.g., specific weights of ash per volume of water), a form of empirical standardization typical of ancient traditional craftsmanship.

Other technical and preparation aspects: Beyond the ingredients, the preparation of barley-based beverages in antiquity, such as *πιτσάνη* (*ptisane*; barley water) and various medicinal decoctions, frequently involved heating or boiling to ensure the softening of the grain and the extraction of nutrients. Hippocrates (On Regimen in Acute Diseases) provides detailed instructions for boiling barley to create a smooth, homogenized mixture. In the context of the kykeon, while the Homeric Hymn does not explicitly detail the temperature, the term *κῦκάω* (*kykao*; to stir/mix) implies a process of homogenization which, in ancient pharmacology, was typically facilitated by heat to ensure that the solid components (barley meal) and additives (herbs, honey cheese and/or wine, as stated above) formed a uniform suspension.

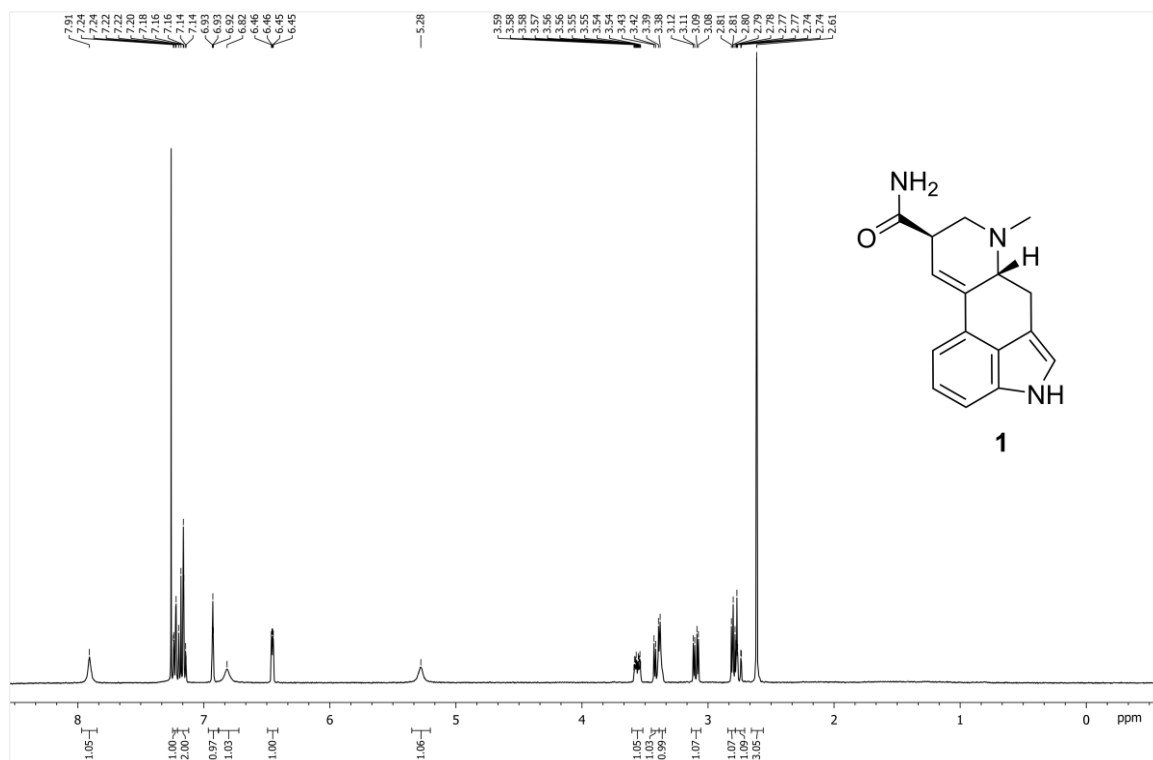

**Figure S1.**  $^1\text{H}$  NMR (400 MHz) spectrum of LSA (compound **1**) in  $\text{CDCl}_3$

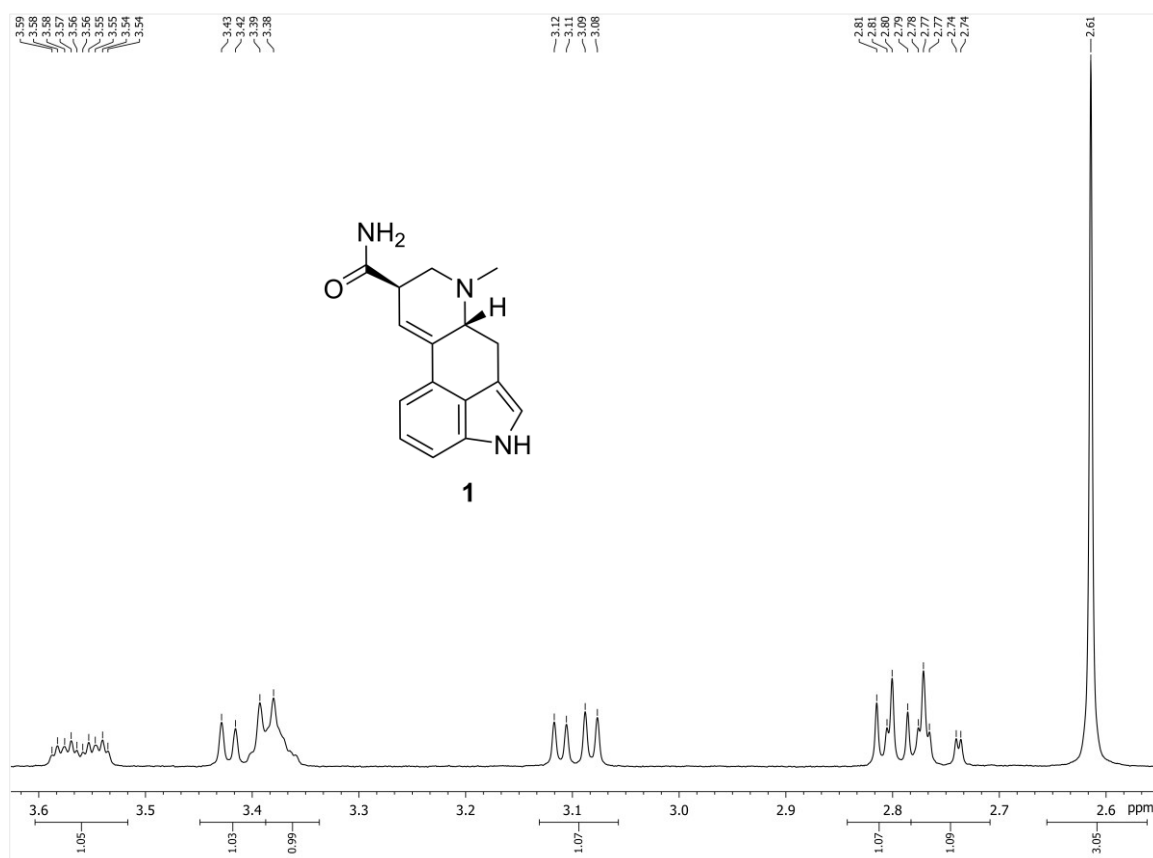

**Figure S2.** Expanded region of the high-field resonances of rings C and D ( $\delta$  2.6–3.6 ppm) of LSA (compound **1**) from Figure S1

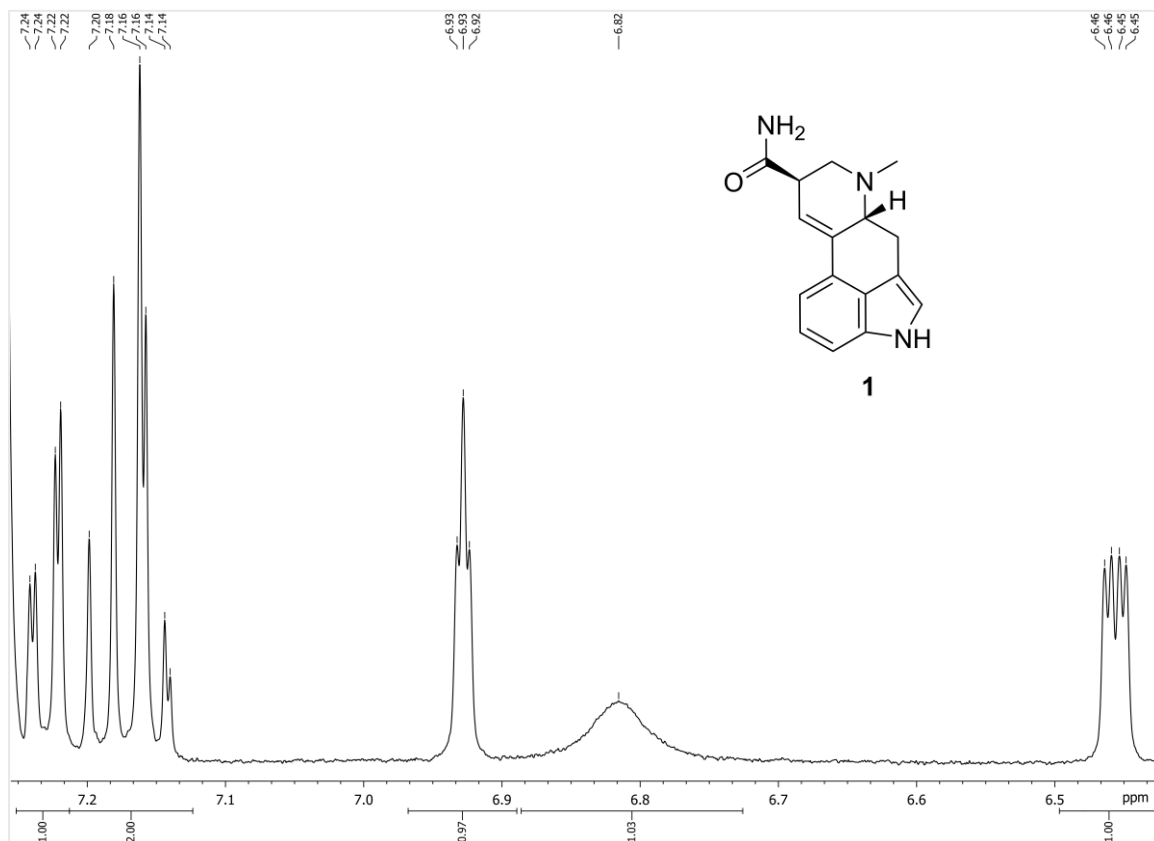

**Figure S3.** Expanded region of the low-field resonances ( $\delta$  6.5–7.3 ppm) of LSA (compound **1**) from Figure S1

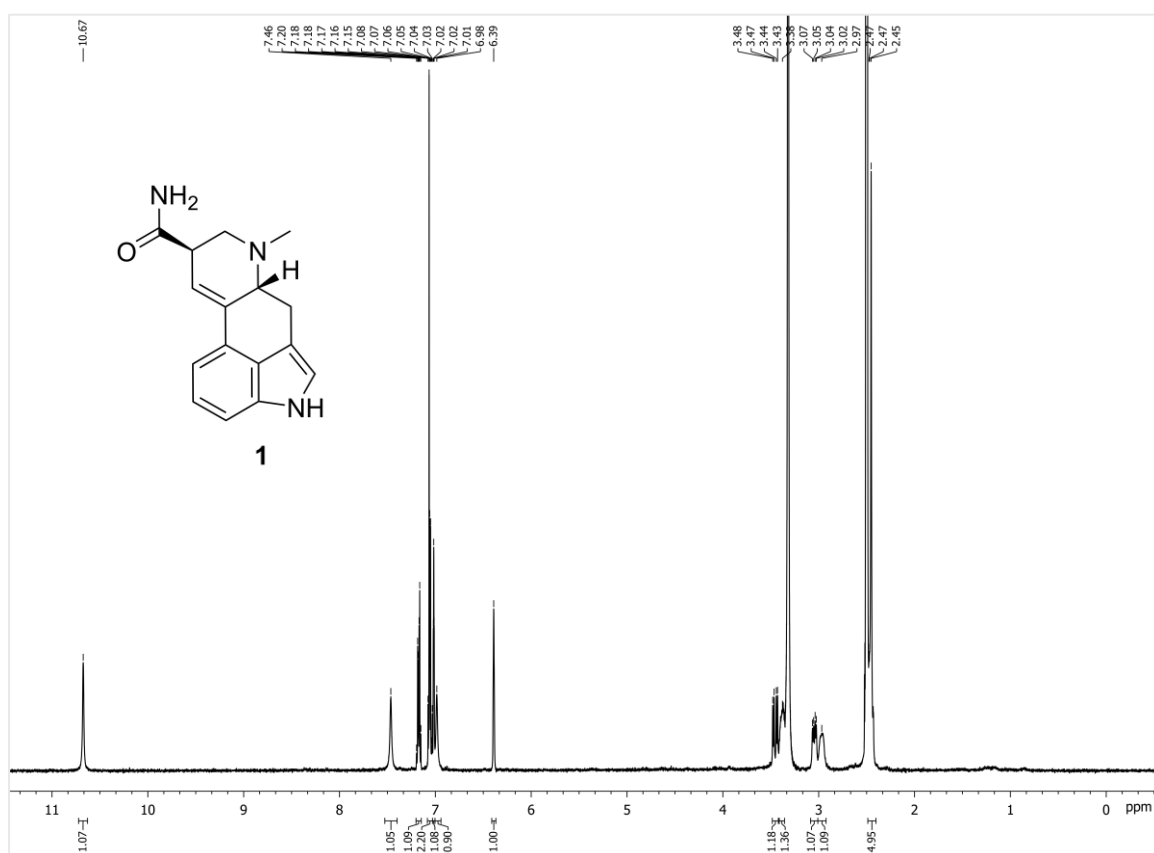

**Figure S4.**  $^1\text{H}$  NMR (400 MHz) spectrum of LSA (compound **1**) in  $\text{DMSO-d}_6$

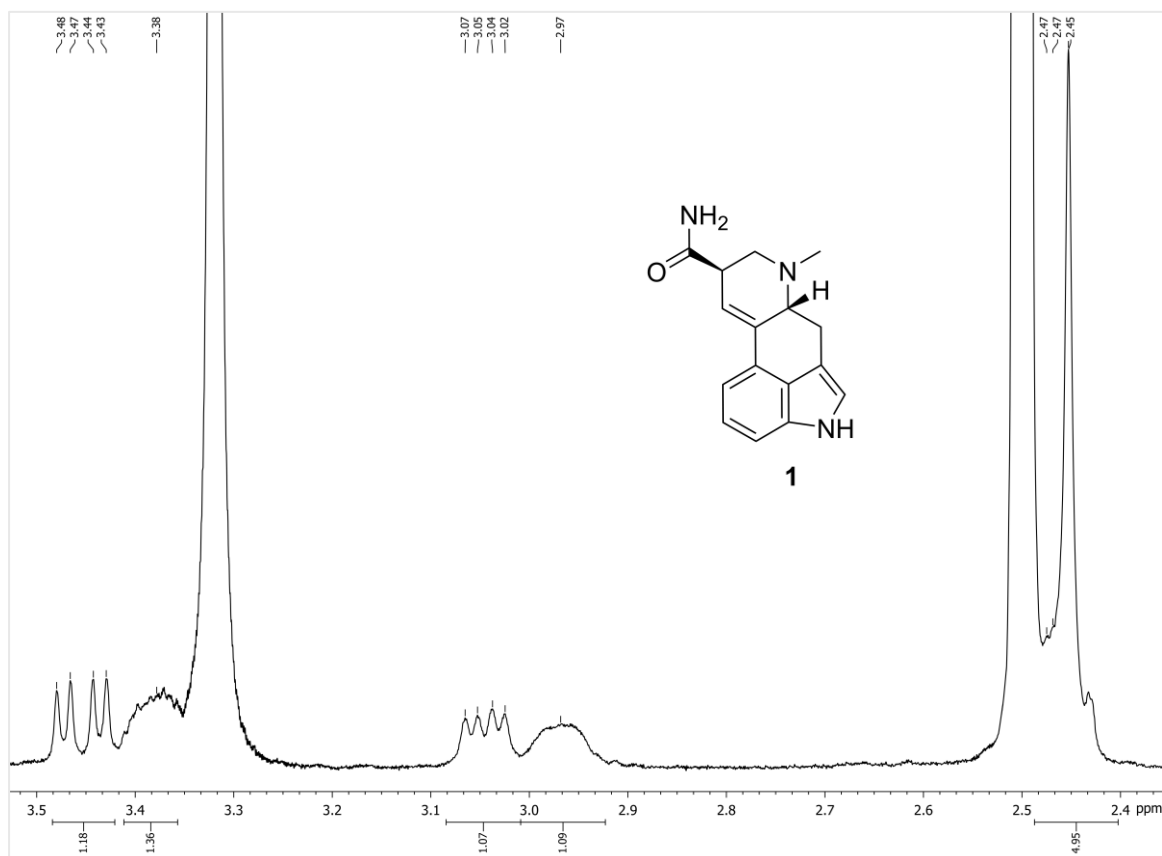

**Figure S5.** Expanded region of the high-field resonances of rings C and D ( $\delta$  2.4–3.5 ppm) of LSA (compound **1**) from Figure S4

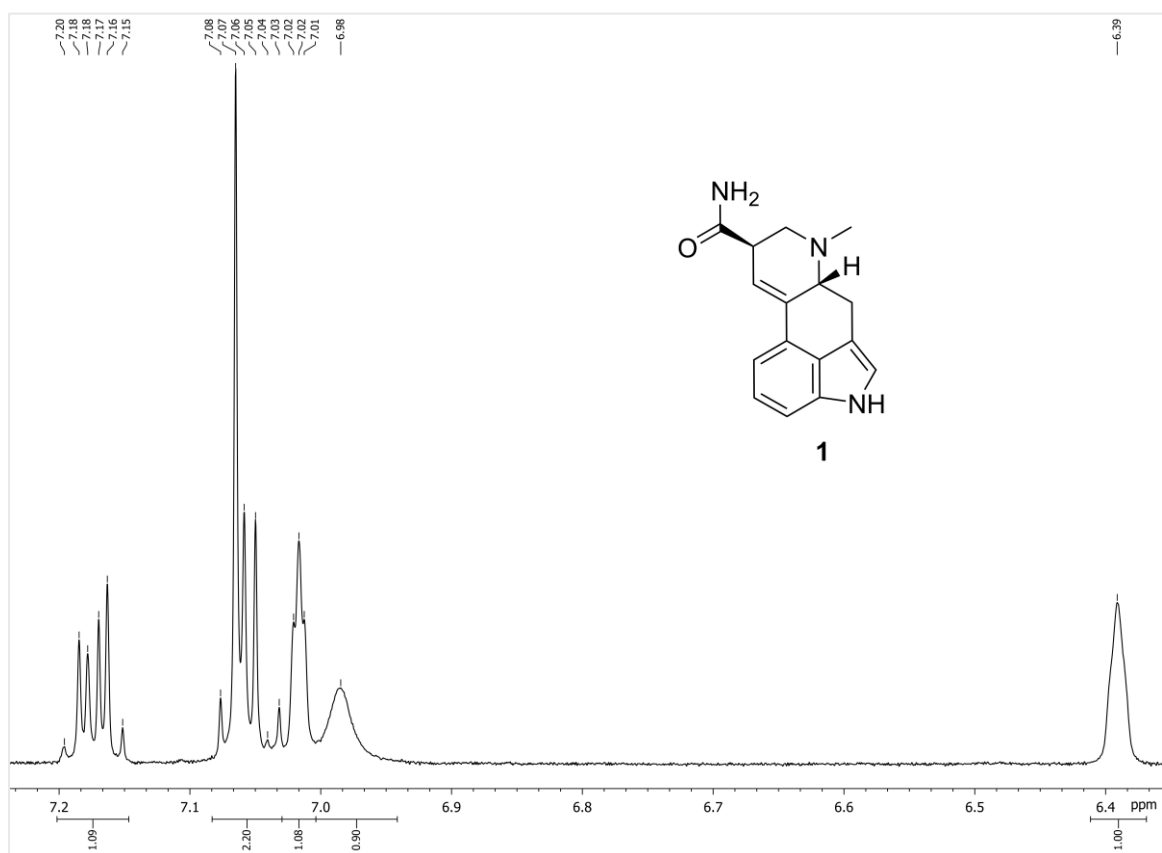

**Figure S6.** Expanded region of the low-field resonances ( $\delta$  6.3–7.2 ppm) of LSA (compound **1**) from Figure S4

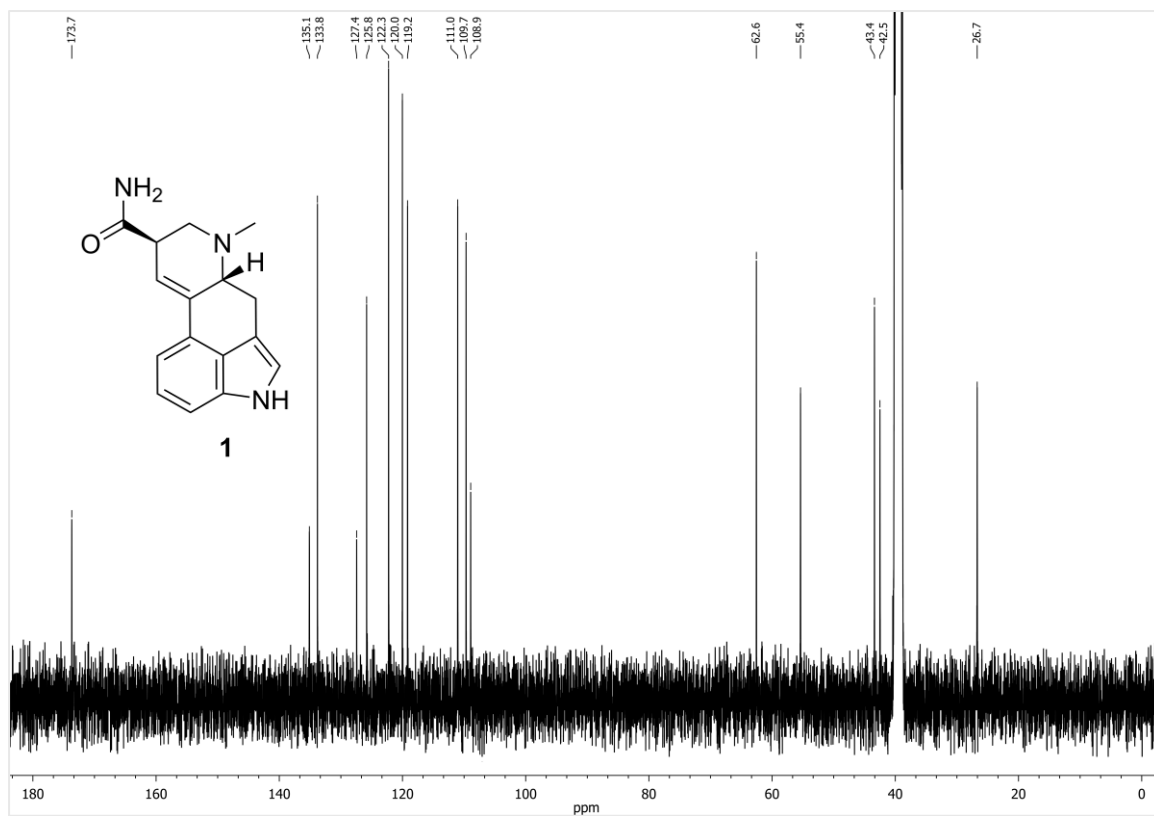

**Figure S7.**  $^{13}\text{C}$  NMR (100 MHz) spectrum of LSA (compound 1) in  $\text{DMSO-d}_6$

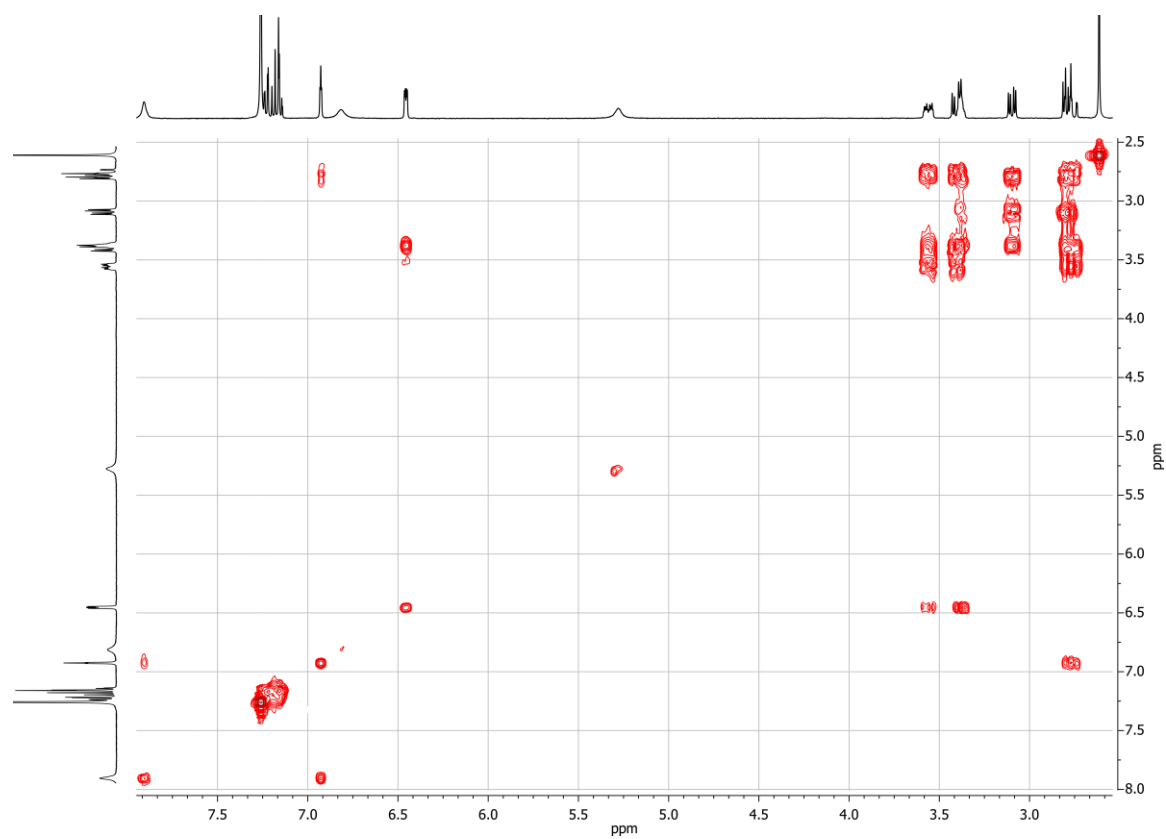

**Figure S8.**  $^1\text{H}$ - $^1\text{H}$  COSY spectrum of LSA (compound 1) in  $\text{CDCl}_3$



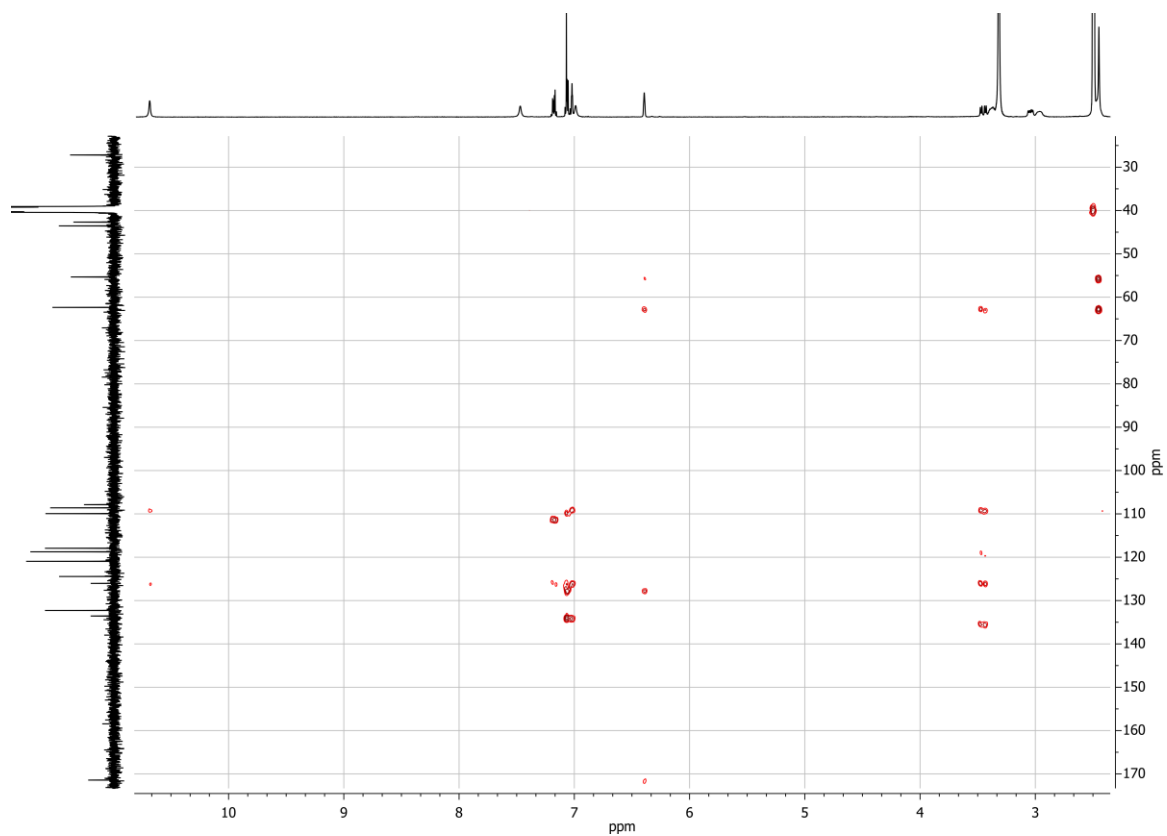

Figure S11.  $^1\text{H}$ - $^{13}\text{C}$  HMBC spectrum of LSA (compound **1**) in  $\text{DMSO-d}_6$

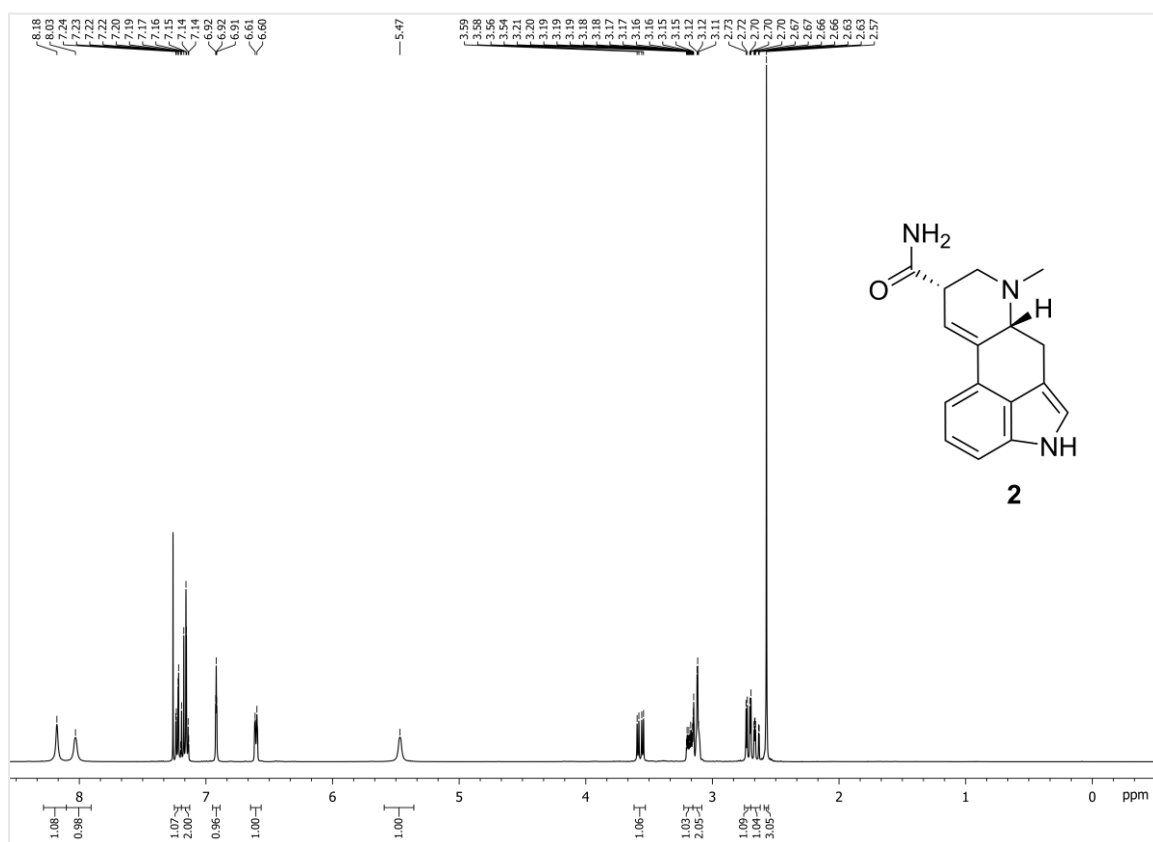

Figure S12.  $^1\text{H}$  NMR (400 MHz) spectra of iso-LSA (compound **2**) in  $\text{CDCl}_3$

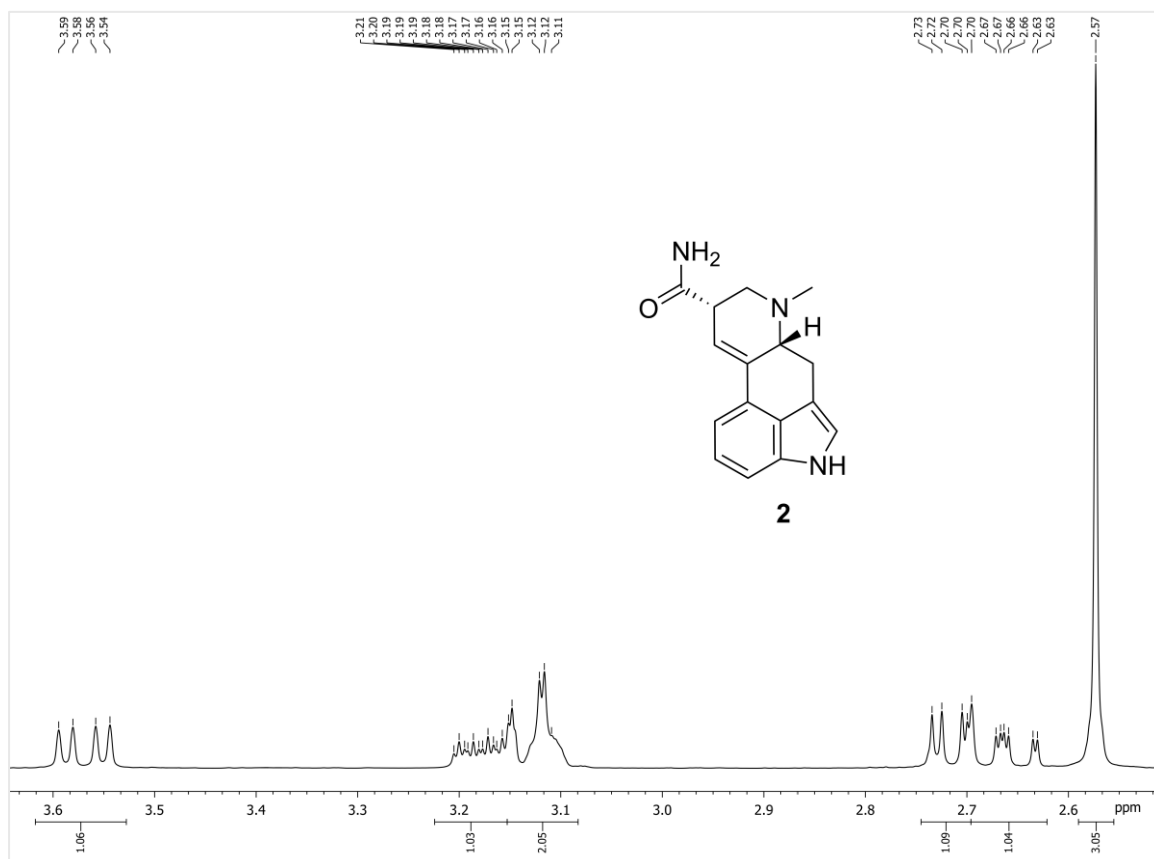

**Figure S13.** Expanded region of the high-field resonances of rings C and D ( $\delta$  2.5–3.6 ppm) of iso-LSA (compound **2**) from Figure S12

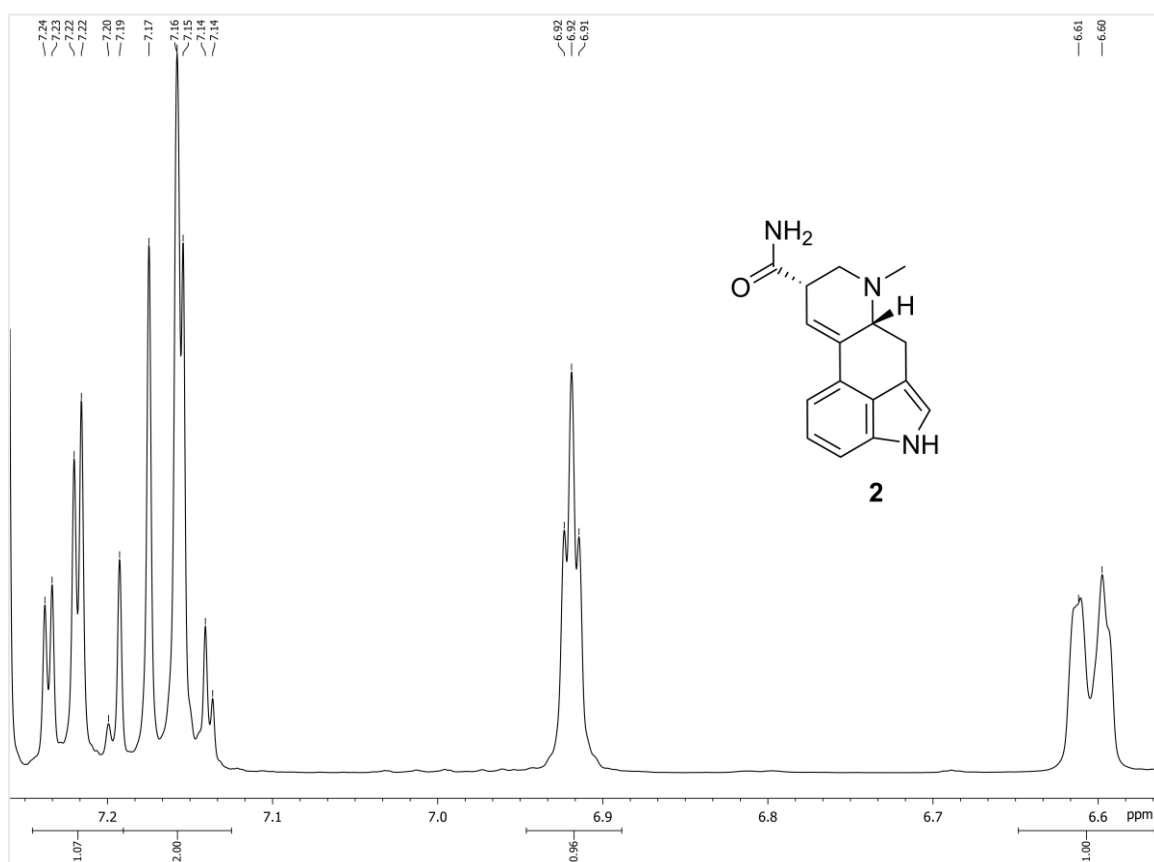

**Figure S14.** Expanded region of the low-field resonances ( $\delta$  6.5–7.3 ppm) of iso-LSA (compound **2**) from Figure S12



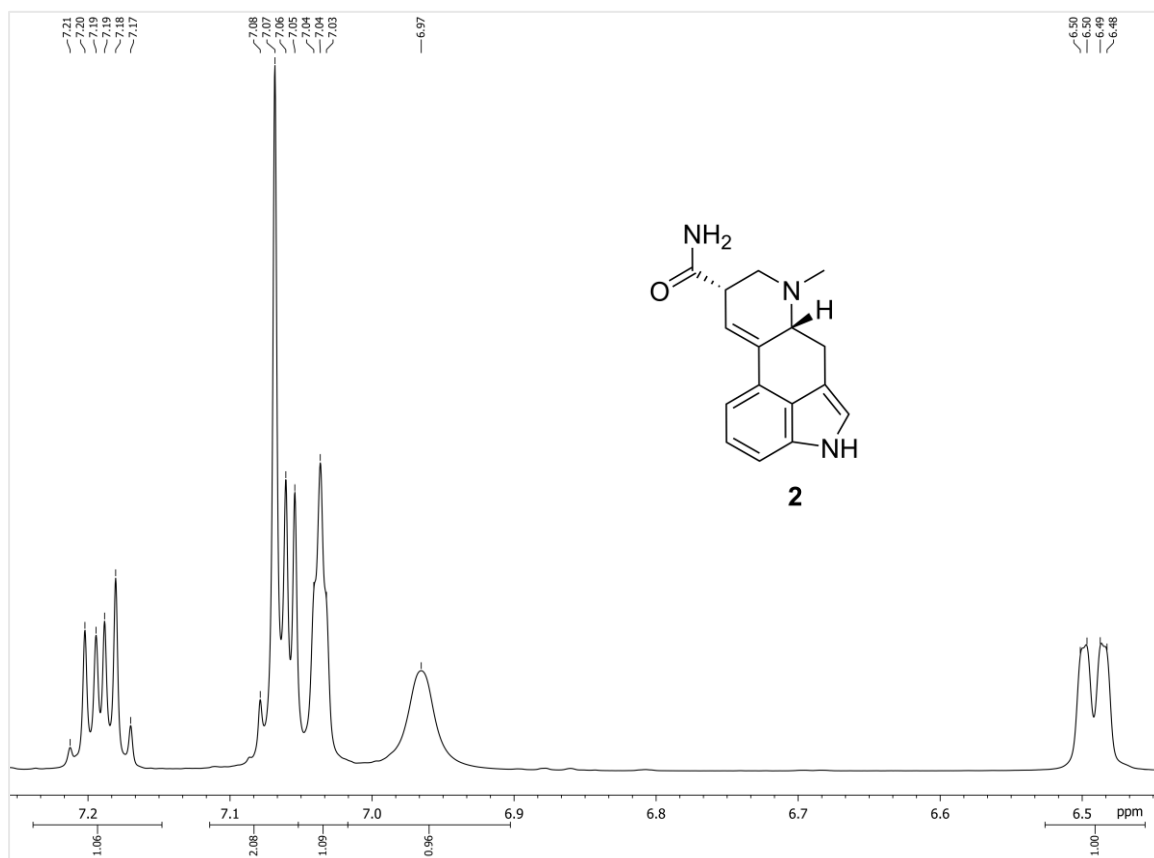

**Figure S17.** Expanded region of the low-field resonances ( $\delta$  6.4–7.3 ppm) of iso-LSA (compound 2) from Figure S15

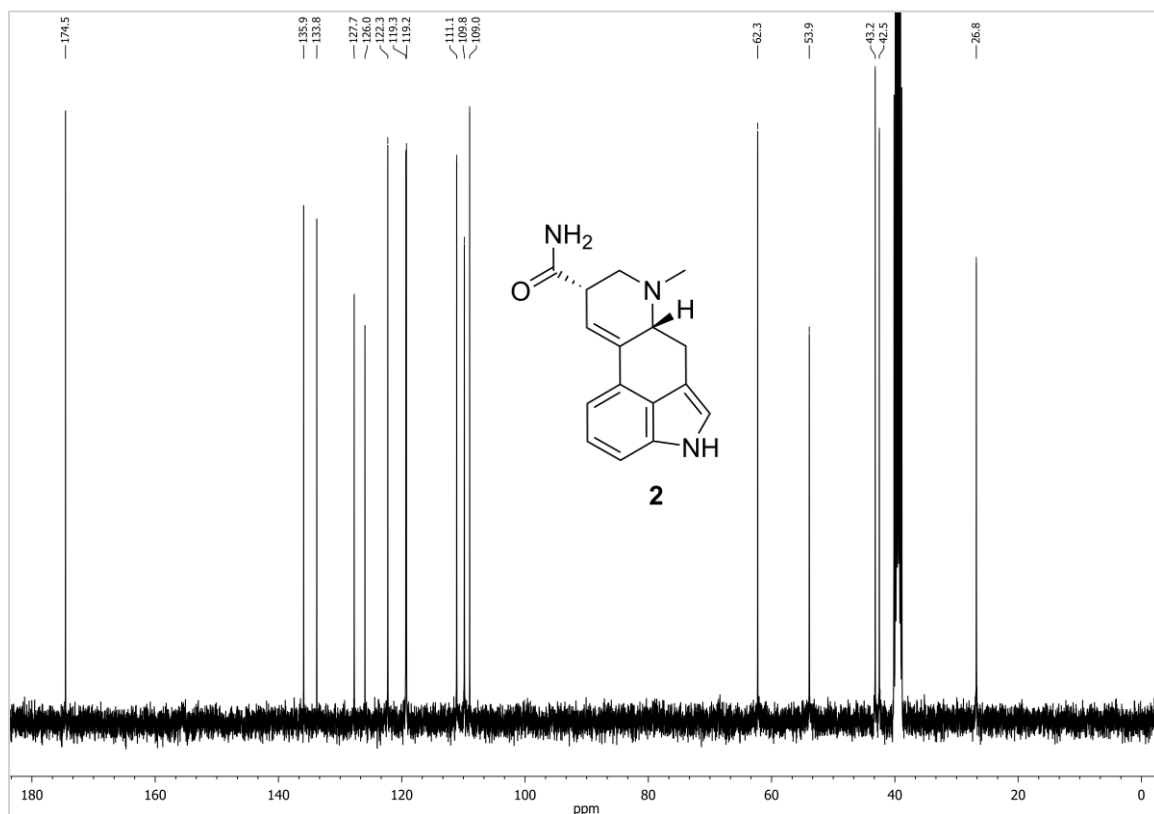

**Figure S18.** <sup>13</sup>C NMR (100 MHz) spectrum of iso-LSA (compound 2) in DMSO-d<sub>6</sub>

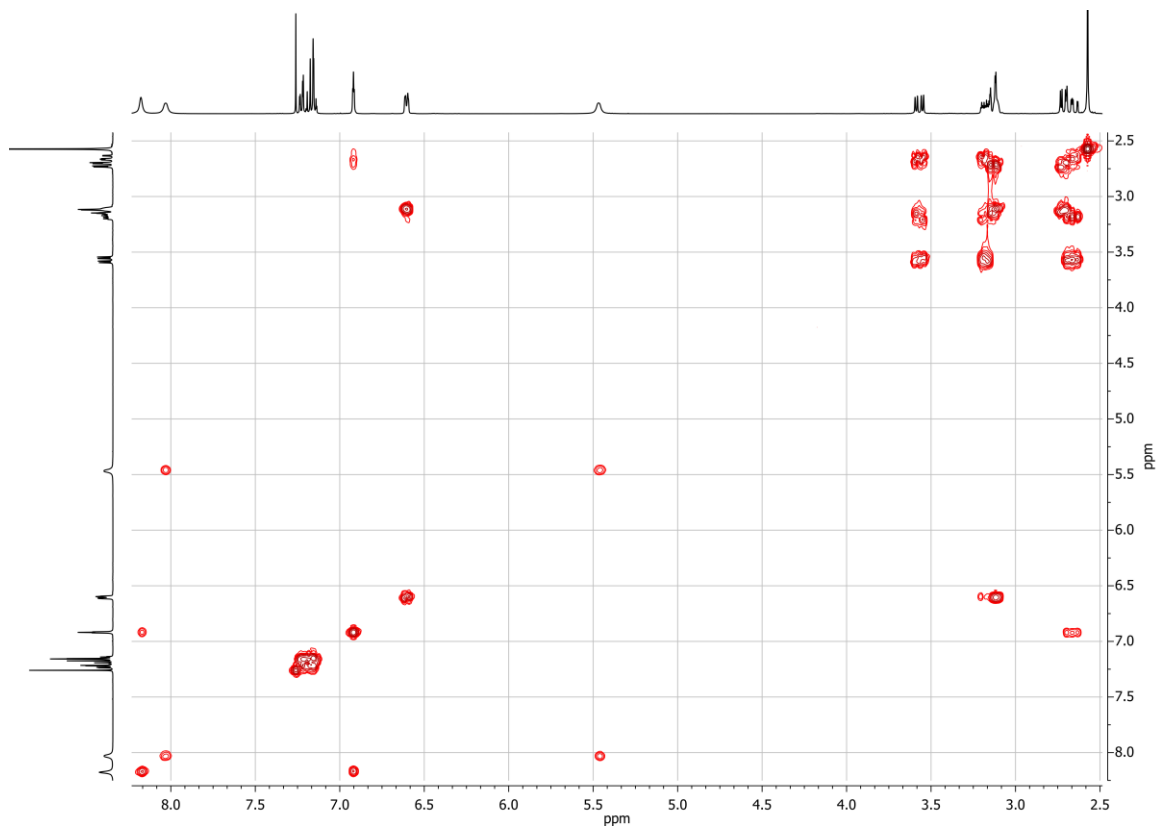

**Figure S19.**  $^1\text{H}$ - $^1\text{H}$  COSY spectrum of iso-LSA (compound **2**) in  $\text{CDCl}_3$

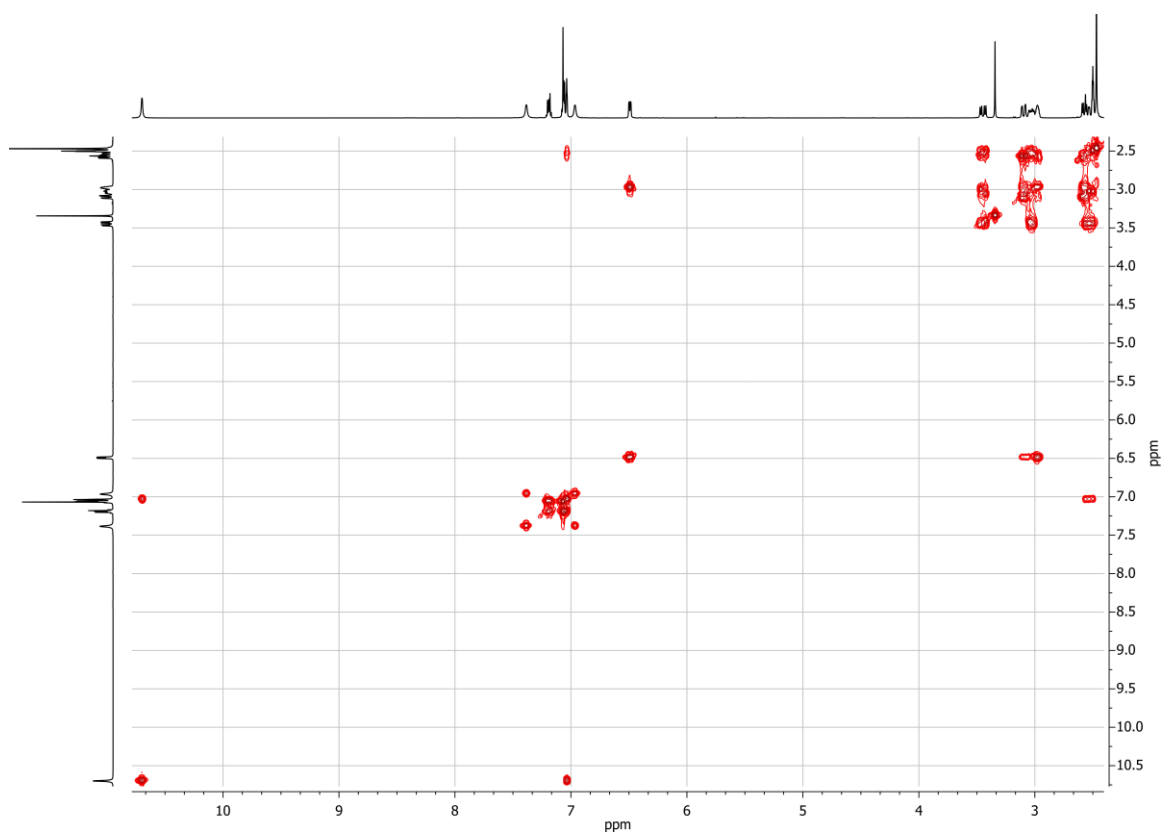

**Figure S20.**  $^1\text{H}$ - $^1\text{H}$  COSY spectrum of iso-LSA (compound **2**) in  $\text{DMSO-d}_6$

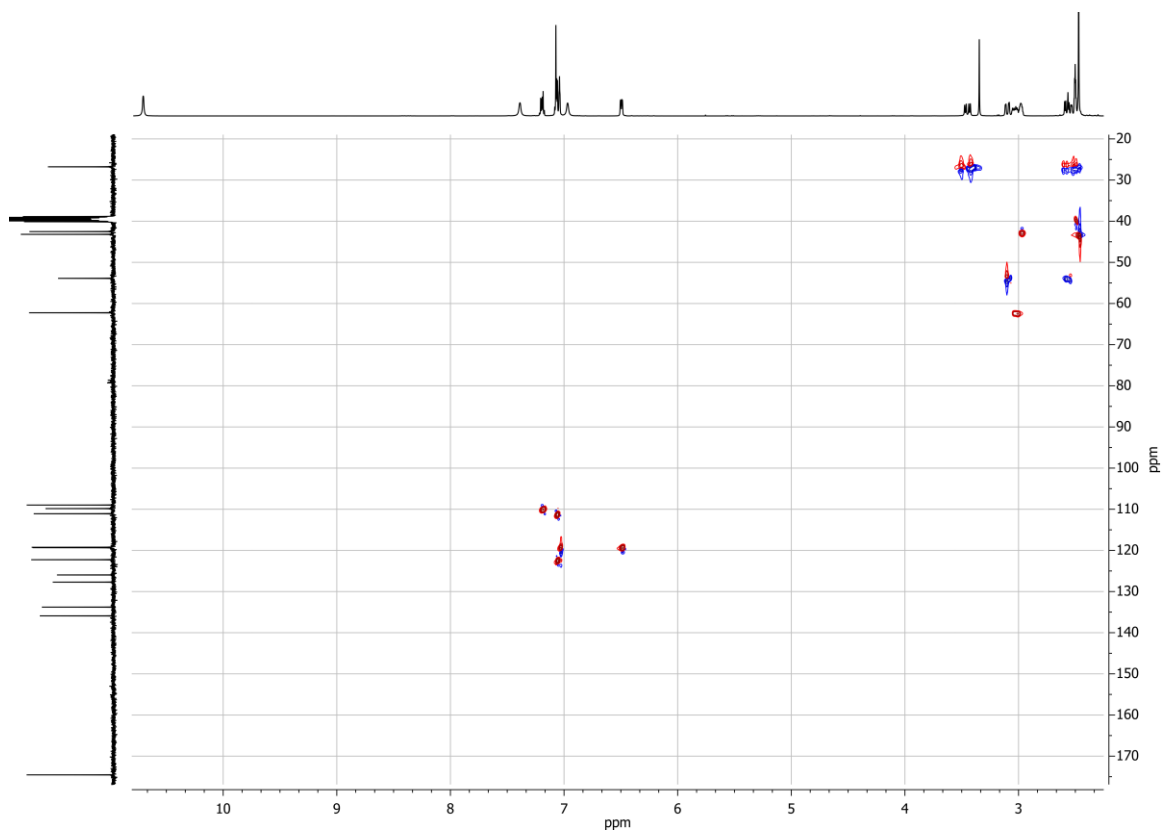

Figure S21.  $^1\text{H}$ - $^{13}\text{C}$  HSQC spectrum of iso-LSA (compound 2) in  $\text{DMSO-d}_6$

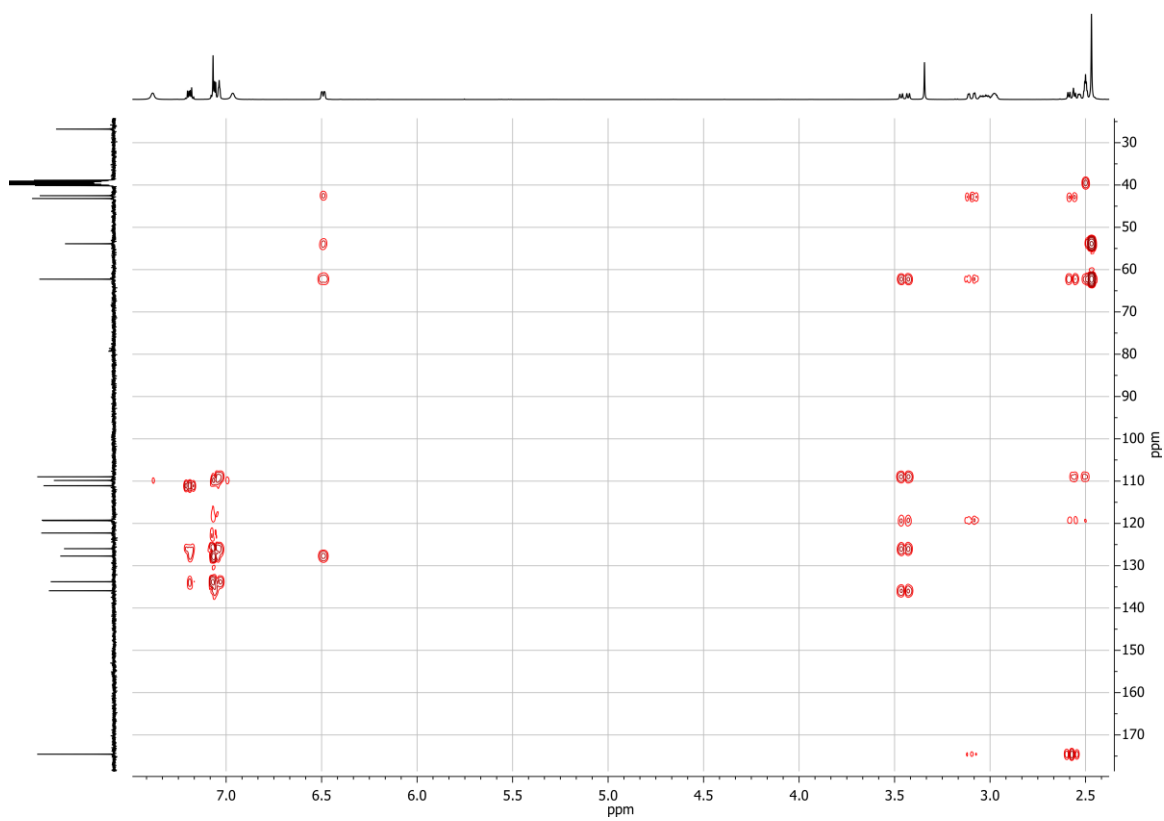

Figure S22.  $^1\text{H}$ - $^{13}\text{C}$  HMBC spectrum of iso-LSA (compound 2) in  $\text{DMSO-d}_6$

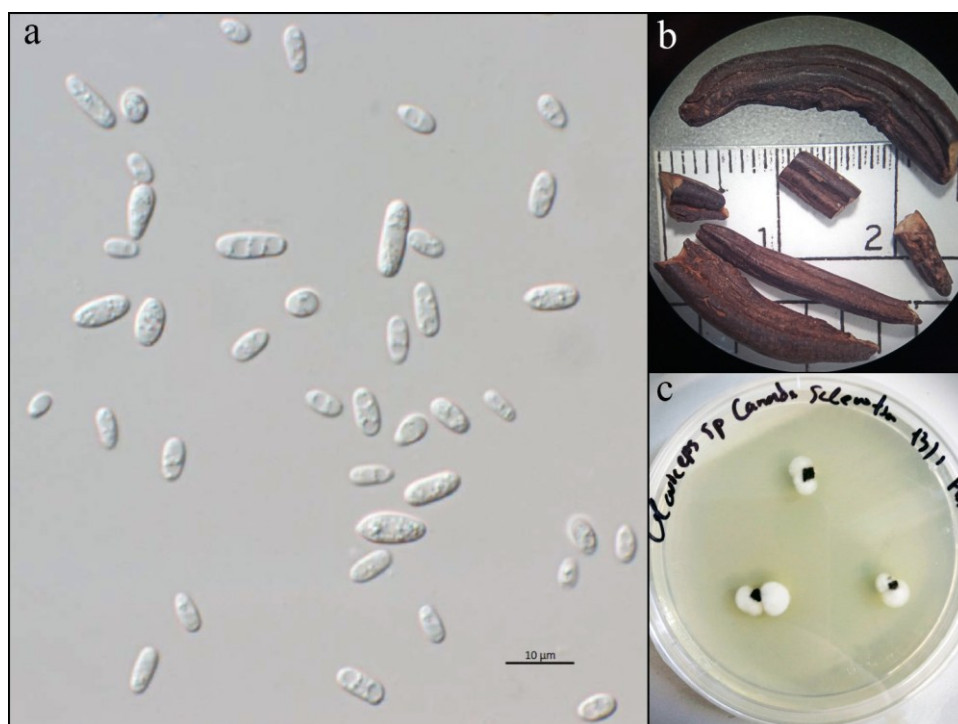

**Figure S23.** a) Conidia at 400× (DIC; scale bar = 10 μm), b) sclerotia (scale in cm), and c) inoculated sclerotia on PDA in a 9 cm Petri plate after 1 week. All images from strain ATHUM 10382.

**Table S1.** Sequence of the ITS rDNA region of ATHUM 10382 (GenBank: PX700742.1)

| rDNA-ITS region (5'→3'; contig length = 738 bases) |            |            |            |            |            |            |
|----------------------------------------------------|------------|------------|------------|------------|------------|------------|
| 1                                                  | GCCCGTCGCT | ACTACCGATT | GAATGGCTCA | GTGAGGCGTC | CGGACTGGCC | CAGAGAGGTG |
| 61                                                 | GGCAACTACC | ACTCAGGGCC | GGAAAGCTCT | CCAAACTCGG | TCATTTAGAG | GAAGTAAAAG |
| 121                                                | TCGTAACAAG | GTCTCCGTTG | GTGAACCAGC | GGAGGGATCA | TTACCGAGTT | TACAACTCCC |
| 181                                                | AAACCCACTG | TGAACTTATA | CCCAAAACGT | TGCCTCGGCG | GGCACAGCGG | TACCCGAGCC |
| 241                                                | CCCCGCAAGG | GAGGCAGAGG | CGCCCGCCCC | CCAGGGGACC | AAAACCTCTC | TGTATACCCA |
| 301                                                | TAGCGGCATG | TCTGAGTGGA | TTTACAAACA | AATGAATCAA | AACTTTCAAC | AACGGATCTC |
| 361                                                | TTGGTTCTGG | CATCGATGAA | GAACGCAGCG | AAATGCGATA | CGTAATGTGA | ATTGCAGAAT |
| 421                                                | TCAGTGAATC | ATCGAATCTT | TGAACGCACA | TTGCGCCCGC | CAGTATTCTG | GCGGGCATGC |
| 481                                                | CTGTTCGAGC | GTCATTTCAA | CCCTCAAGCC | CTGCTTGGTG | TTGGGGACCG | GCTCAGCGGG |
| 541                                                | TGCGGGCTTC | GGCCCGCCCC | GTGCCGCCCC | CGAAATGGAT | CGGCGGTCTC | GTCGCAGCCT |
| 601                                                | TCTTTGCGTA | GTAACATAAC | ACCTCGCAAC | AGGAGCGCGG | CGCGGCCACT | GCCGTAAAAC |
| 661                                                | GCCCAACTTT | TTAGAGTTGA | CCTCGAATCA | GGTAGGAATA | CCCGCTGAAC | TTAAGCATAT |
| 721                                                | CAATAAGCGG | AGGAAGAC   |            |            |            |            |

TIC of reference standards mixed solution, 0.1  $\mu\text{g mL}^{-1}$  each in acetonitrile. Chromatographic conditions as described in Section 2.8.

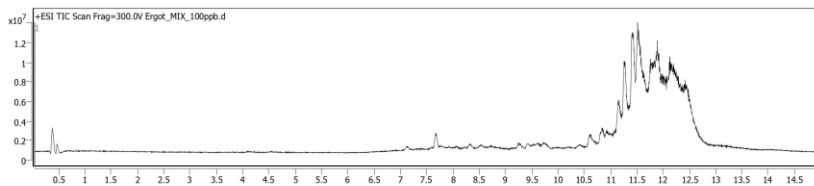

EIC for  $[\text{M}+\text{H}]^+$   $m/z$  269.1444  
Molecular formula:  $\text{C}_{16}\text{H}_{17}\text{N}_3\text{O}$   
peak a: isoergine (iso-LSA)  
peak b: ergine (LSA)

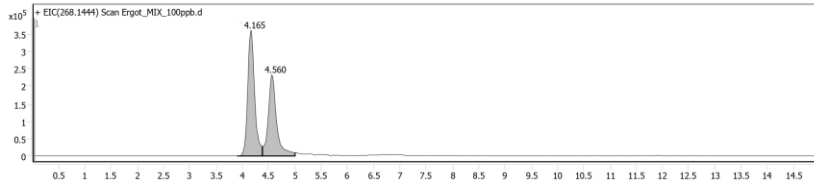

EIC for  $[\text{M}+\text{H}]^+$   $m/z$  326.1868  
Molecular formula:  $\text{C}_{19}\text{H}_{23}\text{N}_3\text{O}_2$   
peak a: ergometrine (Em)  
peak b: ergometrinine (Emn)

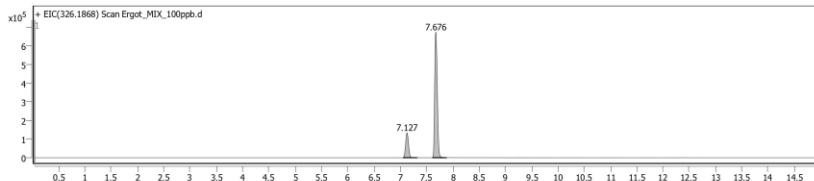

EIC for  $[\text{M}+\text{H}]^+$   $m/z$  548.2872  
Molecular formula:  $\text{C}_{30}\text{H}_{37}\text{N}_5\text{O}_5$   
peak a: ergosinine (Esn)  
peak b: ergosine (Es)

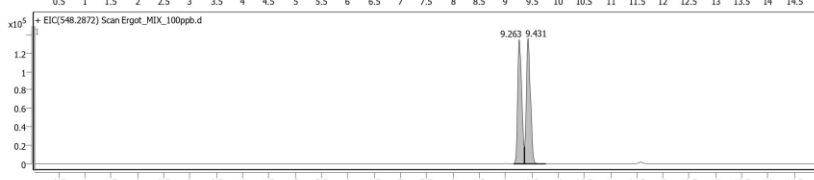

EIC for  $[\text{M}+\text{H}]^+$   $m/z$  562.3029  
Molecular formula:  $\text{C}_{31}\text{H}_{39}\text{N}_5\text{O}_5$   
peak a: ergocornine (Eco)  
peak b: ergocorninine (Econ)

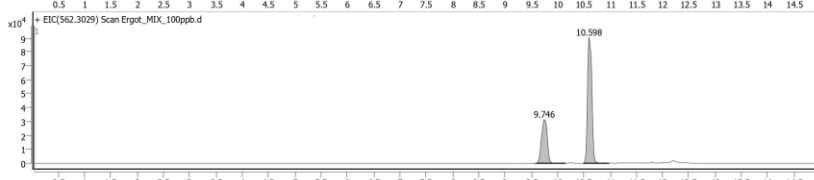

EIC for  $[\text{M}+\text{H}]^+$   $m/z$  576.3185  
Molecular formula:  $\text{C}_{32}\text{H}_{41}\text{N}_5\text{O}_5$   
peak a: ergokryptine (Ekr)  
peak b: ergokryptinine (Ekrn)

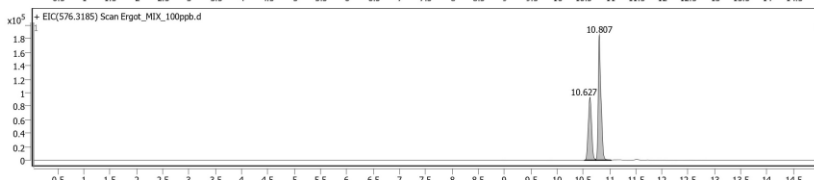

EIC for  $[\text{M}+\text{H}]^+$   $m/z$  582.2716  
Molecular formula:  $\text{C}_{33}\text{H}_{35}\text{N}_5\text{O}_5$   
peak a: ergotaminine (Etn)  
peak b: ergotamine (Et)

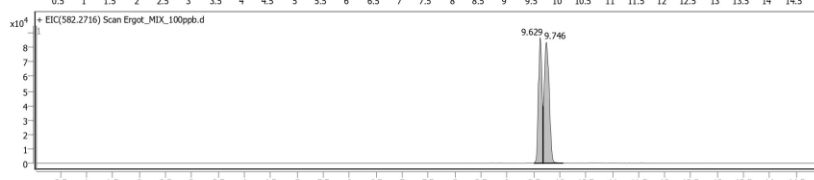

EIC for  $[\text{M}+\text{H}]^+$   $m/z$  610.3029  
Molecular formula:  $\text{C}_{35}\text{H}_{39}\text{N}_5\text{O}_5$   
peak a: ergocristine (Ecr)  
peak b: ergocristinine (Ecrn)

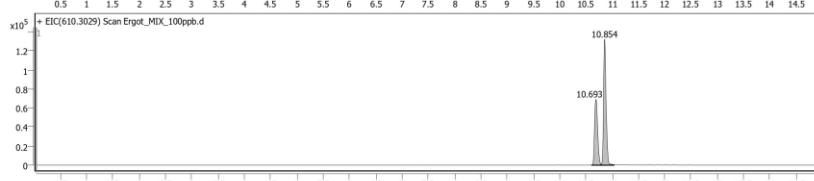

**Figure S24.** Total ion chromatogram (TIC) and extracted ion chromatograms (EICs) of reference standards.

**Table S2.** UHPLC/Q-TOF-HRMS quantitation results for LSA and iso-LSA in the extracts and related calculations.

| Initial lye pH | Ergot concentration in lye (% w/v) | Reaction time (min) | Dry extract yield of 10 mL aliquot (g) | Mean LSA concentration in extract* (mg g <sup>-1</sup> ) | Total LSA in 10 mL aliquot (mg) | Produced LSA (mg g <sup>-1</sup> of ergot used) | Mean iso-LSA concentration in extract* (mg g <sup>-1</sup> ) | Total iso-LSA in 10 mL aliquot (mg) | Produced iso-LSA (mg g <sup>-1</sup> of ergot used) |
|----------------|------------------------------------|---------------------|----------------------------------------|----------------------------------------------------------|---------------------------------|-------------------------------------------------|--------------------------------------------------------------|-------------------------------------|-----------------------------------------------------|
| 7              | 5                                  | 15                  | 0.08                                   | 0.38                                                     | 0.03                            | 0.06                                            | 0.42                                                         | 0.03                                | 0.07                                                |
| 7              | 5                                  | 30                  | 0.10                                   | 0.44                                                     | 0.04                            | 0.09                                            | 0.52                                                         | 0.05                                | 0.11                                                |
| 7              | 5                                  | 60                  | 0.14                                   | 0.67                                                     | 0.09                            | 0.18                                            | 0.82                                                         | 0.11                                | 0.22                                                |
| 7              | 5                                  | 120                 | 0.21                                   | 0.27                                                     | 0.06                            | 0.11                                            | 0.39                                                         | 0.08                                | 0.16                                                |
| 7              | 10                                 | 15                  | 0.19                                   | 0.11                                                     | 0.02                            | 0.02                                            | 0.12                                                         | 0.02                                | 0.02                                                |
| 7              | 10                                 | 30                  | 0.23                                   | 0.16                                                     | 0.04                            | 0.04                                            | 0.23                                                         | 0.05                                | 0.05                                                |
| 7              | 10                                 | 60                  | 0.24                                   | 0.26                                                     | 0.06                            | 0.06                                            | 0.33                                                         | 0.08                                | 0.08                                                |
| 7              | 10                                 | 120                 | 0.29                                   | 0.36                                                     | 0.11                            | 0.11                                            | 0.46                                                         | 0.13                                | 0.13                                                |
| 7              | 20                                 | 15                  | 0.47                                   | 0.07                                                     | 0.03                            | 0.02                                            | 0.08                                                         | 0.04                                | 0.02                                                |
| 7              | 20                                 | 30                  | 0.53                                   | 0.08                                                     | 0.04                            | 0.02                                            | 0.13                                                         | 0.07                                | 0.03                                                |
| 7              | 20                                 | 60                  | 0.55                                   | 0.19                                                     | 0.11                            | 0.05                                            | 0.20                                                         | 0.11                                | 0.05                                                |
| 7              | 20                                 | 120                 | 0.68                                   | 0.24                                                     | 0.16                            | 0.08                                            | 0.28                                                         | 0.19                                | 0.10                                                |
| 10.5           | 5                                  | 15                  | 0.09                                   | 0.78                                                     | 0.07                            | 0.15                                            | 0.61                                                         | 0.06                                | 0.11                                                |
| 10.5           | 5                                  | 30                  | 0.10                                   | 1.18                                                     | 0.12                            | 0.24                                            | 0.97                                                         | 0.10                                | 0.19                                                |
| 10.5           | 5                                  | 60                  | 0.10                                   | 1.67                                                     | 0.18                            | 0.35                                            | 1.40                                                         | 0.15                                | 0.29                                                |
| 10.5           | 5                                  | 120                 | 0.12                                   | 1.12                                                     | 0.14                            | 0.27                                            | 0.82                                                         | 0.10                                | 0.20                                                |
| 10.5           | 10                                 | 15                  | 0.20                                   | 0.32                                                     | 0.07                            | 0.07                                            | 0.27                                                         | 0.05                                | 0.05                                                |
| 10.5           | 10                                 | 30                  | 0.21                                   | 0.40                                                     | 0.08                            | 0.08                                            | 0.27                                                         | 0.06                                | 0.06                                                |
| 10.5           | 10                                 | 60                  | 0.23                                   | 0.71                                                     | 0.16                            | 0.16                                            | 0.55                                                         | 0.13                                | 0.13                                                |
| 10.5           | 10                                 | 120                 | 0.28                                   | 0.46                                                     | 0.13                            | 0.13                                            | 0.37                                                         | 0.10                                | 0.10                                                |
| 10.5           | 20                                 | 15                  | 0.38                                   | 0.10                                                     | 0.04                            | 0.02                                            | 0.11                                                         | 0.04                                | 0.02                                                |
| 10.5           | 20                                 | 30                  | 0.52                                   | 0.11                                                     | 0.06                            | 0.03                                            | 0.11                                                         | 0.06                                | 0.03                                                |
| 10.5           | 20                                 | 60                  | 0.54                                   | 0.21                                                     | 0.11                            | 0.06                                            | 0.20                                                         | 0.11                                | 0.05                                                |
| 10.5           | 20                                 | 120                 | 0.59                                   | 0.36                                                     | 0.21                            | 0.10                                            | 0.39                                                         | 0.23                                | 0.11                                                |
| 11.5           | 5                                  | 15                  | 0.09                                   | 0.63                                                     | 0.06                            | 0.11                                            | 0.54                                                         | 0.05                                | 0.10                                                |
| 11.5           | 5                                  | 30                  | 0.11                                   | 0.33                                                     | 0.04                            | 0.07                                            | 0.29                                                         | 0.03                                | 0.07                                                |
| 11.5           | 5                                  | 60                  | 0.12                                   | 0.41                                                     | 0.05                            | 0.10                                            | 0.44                                                         | 0.05                                | 0.10                                                |
| 11.5           | 5                                  | 120                 | 0.13                                   | 0.47                                                     | 0.06                            | 0.12                                            | 0.27                                                         | 0.04                                | 0.07                                                |
| 11.5           | 10                                 | 15                  | 0.24                                   | 0.44                                                     | 0.11                            | 0.11                                            | 0.51                                                         | 0.13                                | 0.13                                                |
| 11.5           | 10                                 | 30                  | 0.26                                   | 0.86                                                     | 0.22                            | 0.22                                            | 0.88                                                         | 0.22                                | 0.22                                                |
| 11.5           | 10                                 | 60                  | 0.27                                   | 1.10                                                     | 0.29                            | 0.29                                            | 1.40                                                         | 0.38                                | 0.38                                                |
| 11.5           | 10                                 | 120                 | 0.27                                   | 1.19                                                     | 0.32                            | 0.32                                            | 1.06                                                         | 0.29                                | 0.29                                                |
| 11.5           | 20                                 | 15                  | 0.49                                   | 0.60                                                     | 0.29                            | 0.15                                            | 0.66                                                         | 0.32                                | 0.16                                                |
| 11.5           | 20                                 | 30                  | 0.58                                   | 0.73                                                     | 0.42                            | 0.21                                            | 0.86                                                         | 0.49                                | 0.25                                                |
| 11.5           | 20                                 | 60                  | 0.60                                   | 0.93                                                     | 0.56                            | 0.28                                            | 1.17                                                         | 0.70                                | 0.35                                                |
| 11.5           | 20                                 | 120                 | 0.63                                   | 1.54                                                     | 0.96                            | 0.48                                            | 1.75                                                         | 1.10                                | 0.55                                                |
| 12.5           | 5                                  | 15                  | 0.09                                   | 4.21                                                     | 0.38                            | 0.77                                            | 4.93                                                         | 0.45                                | 0.90                                                |
| 12.5           | 5                                  | 30                  | 0.12                                   | 3.32                                                     | 0.38                            | 0.77                                            | 2.91                                                         | 0.34                                | 0.67                                                |
| 12.5           | 5                                  | 60                  | 0.14                                   | 2.88                                                     | 0.39                            | 0.78                                            | 3.66                                                         | 0.50                                | 1.00                                                |
| 12.5           | 5                                  | 120                 | 0.14                                   | 1.89                                                     | 0.27                            | 0.54                                            | 1.69                                                         | 0.24                                | 0.48                                                |
| 12.5           | 10                                 | 15                  | 0.29                                   | 1.98                                                     | 0.57                            | 0.57                                            | 2.39                                                         | 0.68                                | 0.68                                                |
| 12.5           | 10                                 | 30                  | 0.28                                   | 2.70                                                     | 0.76                            | 0.76                                            | 3.95                                                         | 1.12                                | 1.12                                                |
| 12.5           | 10                                 | 60                  | 0.24                                   | 3.37                                                     | 0.81                            | 0.81                                            | 3.02                                                         | 0.72                                | 0.72                                                |
| 12.5           | 10                                 | 120                 | 0.29                                   | 2.69                                                     | 0.77                            | 0.77                                            | 2.00                                                         | 0.57                                | 0.57                                                |
| 12.5           | 20                                 | 15                  | 0.48                                   | 2.14                                                     | 1.02                            | 0.51                                            | 2.24                                                         | 1.07                                | 0.54                                                |
| 12.5           | 20                                 | 30                  | 0.51                                   | 1.79                                                     | 0.91                            | 0.45                                            | 2.09                                                         | 1.06                                | 0.53                                                |
| 12.5           | 20                                 | 60                  | 0.51                                   | 2.17                                                     | 1.11                            | 0.55                                            | 2.05                                                         | 1.05                                | 0.52                                                |
| 12.5           | 20                                 | 120                 | 0.52                                   | 2.22                                                     | 1.15                            | 0.58                                            | 2.07                                                         | 1.08                                | 0.54                                                |

\*Calculated values represent the means of duplicate experimental runs (n=2). The average relative standard deviation (RSD) across all runs was 10.3% for LSA and 11.3% for iso-LSA, with RSD values as low as 0.45% and 5.24%, respectively, under optimal hydrolysis conditions (5% w/v ergot, lye pH 12.5, 120 min).

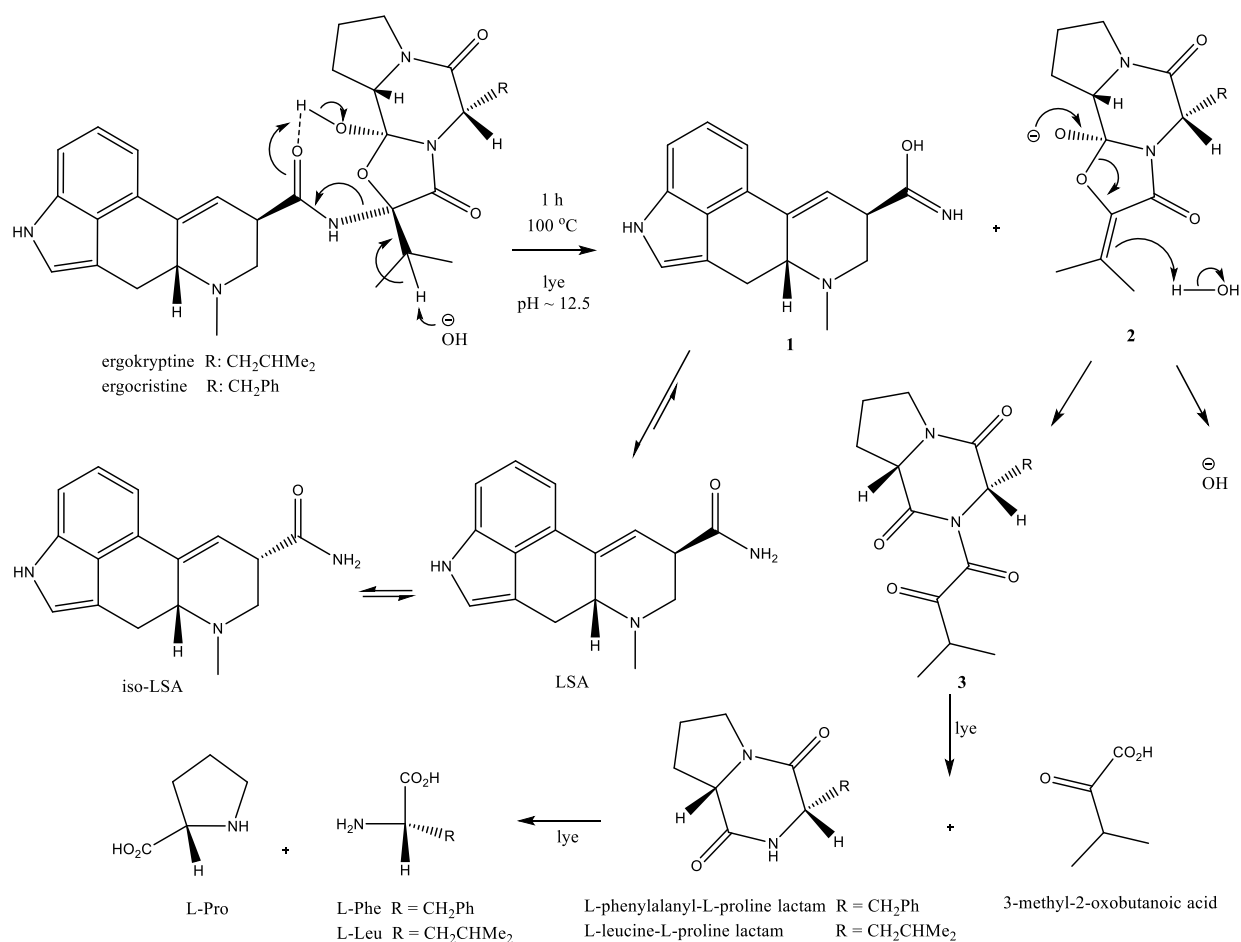

**Figure S25.** Proposed mechanism of the chemical transformation of the ergopeptides ergokryptine and ergocristine into LSA/iso-LSA and non-toxic secondary by-products. The lye solution hydroxide removes a proton from the isopropyl group, thereby initiating a cascade of reactions, probably more or less simultaneous, involving the intramolecular hydrogen bond and leading to the enol tautomer of LSA/iso-LSA (**1**), which rapidly rearranges to LSA and iso-LSA. The other product of this cleavage (**2**) is a reactive intermediate, which rapidly forms a stable compound (**3**) by extracting a proton from the solvent to regenerate a hydroxide ion. This stable compound should itself be easily hydrolyzed in mild base to produce 3-methyl-2-oxobutanoic acid and lactams, harmless dipeptides, which can further hydrolyze to essential amino acids. The same reactions would apply to C-8 epimers and ergopeptames (adapted and based on literature<sup>5,14,15</sup>).

**Table S3.** Results of effect tests and parameter estimates, together with their levels of significance, derived from the model equations employed for LSA.

| Equation 1                     |              |                     |         | Equation 2                     |              |                     |         | Equation 3                  |              |                     |         |
|--------------------------------|--------------|---------------------|---------|--------------------------------|--------------|---------------------|---------|-----------------------------|--------------|---------------------|---------|
| LSA                            | Effect Tests | Parameter Estimates |         |                                | Effect Tests | Parameter Estimates |         |                             | Effect Tests | Parameter Estimates |         |
| Term                           | Prob > F     | Estimate            | Prob> t | Source                         | Prob > F     | Estimate            | Prob> t | Source                      | Prob > F     | Estimate            | Prob> t |
| Intercept                      | -            | 0.0289              | 0.5813  | Intercept                      |              | 0.2291              | 0.0001  | Intercept                   |              | 0.0279              | 0.5891  |
| X <sub>1</sub>                 | 0.0001       | 0.2703              | 0.0001  | X <sub>1</sub>                 | 0.0001       | 0.2197              | 0.0001  | X <sub>1</sub>              | 0.0001       | 0.2711              | 0.0001  |
| X <sub>2</sub>                 | 0.2462       | -0.0261             | 0.2462  | X <sub>2</sub>                 | 0.4546       | -0.0192             | 0.4546  | X <sub>2</sub>              | 0.0908       | -0.0350             | 0.0908  |
| X <sub>3</sub>                 | 0.0395       | 0.0495              | 0.0395  | X <sub>3</sub>                 | 0.2425       | 0.0304              | 0.2425  | X <sub>3</sub>              | 0.0431       | 0.0454              | 0.0431  |
| X <sub>1</sub> <sup>2</sup>    | 0.0001       | 0.3693              | 0.0001  | X <sub>1</sub> *X <sub>2</sub> | 0.8909       | -0.0020             | 0.8909  | X <sub>1</sub> <sup>2</sup> | 0.0001       | 0.3693              | 0.0001  |
| X <sub>2</sub> <sup>2</sup>    | 0.7599       | -0.0125             | 0.7599  | X <sub>1</sub> *X <sub>3</sub> | 0.9902       | -0.0438             | 0.9902  | X <sub>2</sub> <sup>2</sup> | 0.7564       | -0.0125             | 0.7564  |
| X <sub>3</sub> <sup>2</sup>    | 0.1756       | -0.0575             | 0.1756  | X <sub>2</sub> *X <sub>3</sub> | 0.4213       | 0.0467              | 0.4213  | X <sub>3</sub> <sup>2</sup> | 0.1692       | -0.0575             | 0.1692  |
| X <sub>1</sub> *X <sub>2</sub> | 0.8203       | -0.0061             | 0.8203  |                                |              |                     |         |                             |              |                     |         |
| X <sub>1</sub> *X <sub>3</sub> | 0.9838       | -0.0006             | 0.9838  |                                |              |                     |         |                             |              |                     |         |
| X <sub>2</sub> *X <sub>3</sub> | 0.1863       | 0.0354              | 0.1863  |                                |              |                     |         |                             |              |                     |         |

X1 : lye pH, X2 : ergot powder concentration in the lye, and X3 : reaction time

**Table S4.** Results of effect tests and parameter estimates, together with their levels of significance, derived from the model equations employed for iso-LSA.

| iso-LSA                        |          |          |         | Effect Tests                   |          |          |         | Parameter Estimates         |          |          |         |
|--------------------------------|----------|----------|---------|--------------------------------|----------|----------|---------|-----------------------------|----------|----------|---------|
| Term                           | Prob > F | Estimate | Prob> t | Source                         | Prob > F | Estimate | Prob> t | Source                      | Prob > F | Estimate | Prob> t |
| Intercept                      | -        | 0.0191   | 0.7700  | Intercept                      |          | 0.2291   | 0.0001  | Intercept                   |          | 0.0158   | 0.8096  |
| X <sub>1</sub>                 | 0.0001   | 0.2727   | 0.0001  | X <sub>1</sub>                 | 0.0001   | 0.2197   | 0.0001  | X <sub>1</sub>              | 0.0001   | 0.2823   | 0.0001  |
| X <sub>2</sub>                 | 0.5359   | -0.0173  | 0.5359  | X <sub>2</sub>                 | 0.6549   | -0.0192  | 0.6549  | X <sub>2</sub>              | 0.2885   | -0.0277  | 0.2885  |
| X <sub>3</sub>                 | 0.2229   | 0.0360   | 0.2229  | X <sub>3</sub>                 | 0.5041   | 0.0304   | 0.5041  | X <sub>3</sub>              | 0.4570   | 0.0209   | 0.4570  |
| X <sub>1</sub> <sup>2</sup>    | 0.0001   | 0.4213   | 0.0001  | X <sub>1</sub> *X <sub>2</sub> | 0.9697   | -0.0020  | 0.9697  | X <sub>1</sub> <sup>2</sup> | 0.0001   | 0.4213   | 0.0001  |
| X <sub>2</sub> <sup>2</sup>    | 0.6919   | -0.0203  | 0.6919  | X <sub>1</sub> *X <sub>3</sub> | 0.4456   | -0.0438  | 0.4456  | X <sub>2</sub> <sup>2</sup> | 0.6934   | -0.0203  | 0.6934  |
| X <sub>3</sub> <sup>2</sup>    | 0.1577   | -0.0751  | 0.1577  | X <sub>2</sub> *X <sub>3</sub> | 0.3699   | 0.0467   | 0.3699  | X <sub>3</sub> <sup>2</sup> | 0.1594   | -0.0751  | 0.1594  |
| X <sub>1</sub> *X <sub>2</sub> | 0.9526   | -0.0020  | 0.9526  |                                |          |          |         |                             |          |          |         |
| X <sub>1</sub> *X <sub>3</sub> | 0.2350   | -0.0438  | 0.2350  |                                |          |          |         |                             |          |          |         |
| X <sub>2</sub> *X <sub>3</sub> | 0.1636   | 0.0467   | 0.1636  |                                |          |          |         |                             |          |          |         |

X1 : lye pH, X2 : ergot powder concentration in the lye, and X3 : reaction time

**Table S5.** Summary of fit based on the model equations applied for LSA and iso-LSA.

|                               | LSA Summary of Fit |            |            | iso-LSA Summary of Fit |            |            |
|-------------------------------|--------------------|------------|------------|------------------------|------------|------------|
|                               | Equation 1         | Equation 2 | Equation 3 | Equation 1             | Equation 2 | Equation 3 |
| <b>R<sup>2</sup></b>          | 0.830032           | 0.496444   | 0.821693   | 0.781616               | 0.421537   | 0.761629   |
| <b>R<sup>2</sup> Adj</b>      | 0.789776           | 0.422752   | 0.795599   | 0.729893               | 0.336884   | 0.726745   |
| <b>Root Mean Square Error</b> | 0.116012           | 0.192239   | 0.114394   | 0.145051               | 0.227273   | 0.145894   |

## References

1. Flieger, M. *et al.* Ergochromes: Heretofore neglected side of ergot toxicity. *Toxins* **11**, 439. <https://doi.org/10.3390/toxins11080439> (2019).
2. Guerre, P. Ergot alkaloids produced by endophytic fungi of the genus *Epichloë*. *Toxins* **7**, 773–790. <https://doi.org/10.3390/toxins7030773> (2015).
3. Hazel, C. M. & Panaccione, D. G. A new species of *Periglandula* symbiotic with the morning glory *Ipomoea tricolor*. *Mycologia* **117**, 602–614. <https://doi.org/10.1080/00275514.2025.2483634> (2025).
4. Uhlig, S., Petersen, D., Rolèn, E., Egge-Jacobsen, W. & Vrålstad, T. Ergosedmine, a new peptide ergot alkaloid (ergopeptine) from the ergot fungus, *Claviceps purpurea* parasitizing *Calamagrostis arundinacea*. *Phytochemistry Letters* **4**, 79–85. <https://doi.org/10.1016/j.phytol.2010.09.004> (2011).
5. Dewick, P. M. *Medicinal Natural Products: A Biosynthetic Approach*. (J. Wiley, Chichester, 2009).
6. Jakubczyk, D., Cheng, J. Z. & O'Connor, S. E. Biosynthesis of the ergot alkaloids. *Nat. Prod. Rep.* **31**, 1328–1338. <https://doi.org/10.1039/C4NP00062E> (2014).
7. Arroyo-Manzanares, N., Gámiz-Gracia, L., García-Campaña, A. M., Diana Di Mavungu, J. & De Saeger, S. Ergot alkaloids: Chemistry, biosynthesis, bioactivity, and methods of analysis. in *Fungal Metabolites* (eds Mérillon, J.-M. & Ramawat, K. G.) 887–929. [https://doi.org/10.1007/978-3-319-25001-4\\_1](https://doi.org/10.1007/978-3-319-25001-4_1) (Springer International Publishing, Cham, 2017).
8. Flieger, M., Wurst, M. & Shelby, R. Ergot alkaloids — Sources, structures and analytical methods. *Folia Microbiol* **42**, 3–30. <https://doi.org/10.1007/BF02898641> (1997).
9. Hofmann, A. Historical view on ergot alkaloids. *Pharmacology* **16**, 1–11. <https://doi.org/10.1159/000136803> (1978).
10. Schiff, P. L. Ergot and its alkaloids. *Am J Pharm Educ* **70**, 98. <https://doi.org/10.5688/aj700598> (2006).
11. Kidrič, J., Kocjan, D. & Hadži, D. Conformational analysis of the D ring of lysergic acid amides and its bioactive conformation. *Croatica Chemica Acta* **58**, 389–397. (1985).
12. Watkins, C. Let us now praise famous grains. *Proceedings of the American Philosophical Society* **122**, 9–17. <https://www.jstor.org/stable/986259> (1978).
13. Rosen, R. M. Hipponax Fr. 48 Dg. and the Eleusinian kykeon. *The American Journal of Philology* **108**, 416. <https://doi.org/10.2307/294663> (1987).
14. Wasson, R. G. *et al.* *The Road to Eleusis: Unveiling the Secret of the Mysteries*. (North Atlantic Books, Berkeley, 2008).
15. Webster, P., Ruck, C. & Perrine, D. Mixing the kykeon. *Eleusis J. Psychoact. Plants Compd* **4**, 3–18. (2000).
